# Supplementary material for: The bacterial cell cycle regulator GcrA is a σ70 cofactor that drives gene expression from a subset of methylated promoters
Source: PubMed Central journal article supplement — Genes Dev. 2015 Nov 1;29(21):2272–86. doi: 10.1101/gad.270660.115 (PMC4647560; doi:10.1101/gad.270660.115), 2015-11-01

## **Supplemental Information for:**

**The bacterial cell-cycle regulator GcrA is a  $\sigma^{70}$  co-factor that drives gene expression from a subset of methylated promoters**

Diane L. Haakonsen, Andy H. Yuan, and Michael T. Laub

### **Content:**

Supplemental Figure 1

Supplemental Figure 2

Supplemental Figure 3

Supplemental Figure 4

Supplemental Figure 5

Supplemental Figure 6

Supplemental Figure Legends

Supplemental Materials and Methods

Supplemental References

Supplemental Table 1 – Microarray gene expression data

Supplemental Table 2 – Transcription start sites

Supplemental Table 3 – GcrA regulon

Supplemental Table 4 – Strains

Supplemental Table 5 – Plasmids

Supplemental Table 6 – Primers

Supplemental Table 7 – ChIP-Seq strains and conditions

## Supplemental Figure Legends

**Figure S1. Controls for ChIP-Seq experiments.** (A) Abundance of GcrA and GcrA-3xFLAG was assessed by immunoblotting with a polyclonal GcrA antibody. Serial three-fold dilutions are shown. RpoA is a loading control. Morphology of the indicated strains grown to exponential phase was examined via phase microscopy. (B) Scatterplot of ChIP-Seq signals for two GcrA-3xFLAG strains ( $\Delta gcrA$ ,  $P_{xyI-gcrA-3xFLAG}$  grown in PYE + xylose) and ( $P_{gcrA-gcrA-3xFLAG}$  grown in PYE) at  $\sigma^{70}$  promoters with normalized  $\sigma^{70}$  signal  $> 0.1$  (N=450). (C) ChIP-Seq profiles of GcrA (red) ( $\Delta gcrA$ ,  $P_{xyI-gcrA-3xFLAG}$  grown in PYE + xylose) and untagged GcrA (black) ( $\Delta gcrA$ ,  $P_{xyI-gcrA}$  grown in PYE + xylose) both immunoprecipitated with an anti-FLAG antibody. (D) Scatterplot of ChIP-Seq signals for GcrA ( $\Delta gcrA$ ,  $P_{xyI-gcrA-3xFLAG}$  grown in PYE + xylose) and  $\sigma^{70}$  (wild-type grown in PYE) at  $\sigma^{70}$  promoters with normalized  $\sigma^{70}$  signal  $> 0.1$  (N=450). (E) Scatterplot of ChIP-Seq signals for RNAP ( $rpoC::rpoC-3xFLAG$  grown in PYE) and  $\sigma^{70}$  (wild-type grown in PYE) at  $\sigma^{70}$  promoters with normalized  $\sigma^{70}$  signal  $> 0.1$  (N=450). (F) Rifampicin-treated and untreated ChIP-Seq signals for GcrA and  $\sigma^{70}$  at two promoters that are not bound in untreated condition. The two genomic regions are schematized at the bottom with vertical black lines indicating locations of GANTC methylation sites.

**Figure S2. GcrA does not interact with other *Caulobacter* sigma factors; a region of domain 2 in  $\sigma^{70}$  interacts with GcrA.** (A) Bacterial two-hybrid analysis of the interaction between GcrA and the 16 predicted alternative *Caulobacter* sigma factors is shown. The number on top of each column is the CCNA gene number of the sigma factor tested. (B) Alignment of domain 2 of *Caulobacter* and *E. coli*  $\sigma^{70}$ . Chimera composition is given below the alignment with blue for *Caulobacter* and red for *E. coli*. The same color scheme is shown on the *E. coli* crystal structure of domain 2 (4LK1) (Bae et al. 2013). N and C termini are labeled on the crystal structures. Bacterial two-hybrid analysis of the interaction between GcrA and domain 2 of  $\sigma^{70}$  from *Caulobacter*, *E. coli*, and chimeras 1 and 2. (C) Western blot using anti-FLAG antibody for variants of GcrA-3xFLAG after 2 hour induction with 0.3% xylose; related to (Fig. 2G). FL is for full-length, E is the empty vector.

**Figure S3. *In vitro* filter binding assay for methylated probes; enrichment of methylation sites at  $\sigma^{70}$  promoters.** (A) Scatterplot of ChIP-Seq signals for GcrA ( $\Delta gcrA$ ,  $P_{xyI-gcrA-3xFLAG}$  grown in PYE + xylose) and  $\sigma^{70}$  (wild-type grown in PYE) at  $\sigma^{70}$  promoters. Promoters with at

least one methylation site within 40 bp of the transcription start site are shown in blue, the rest are in black. (B) *In vitro* GcrA binding affinity measured by filter binding for the probes (each ~160-200 bp) indicated. The average for three replicates with SD is shown. The  $P_{mipZ}$  panel includes the same data in Fig. 3D for comparison. Sequences surrounding the methylation sites in  $P_{mipZ}$  and  $P_{ftsZ}$  and their ranks are indicated. (C) The ChIP signals for GcrA, RNAP and  $\sigma^{70}$  from rifampicin-treated cells at the *mipZ* and *ftsZ* promoters. The transcriptional start sites are shown for reference. Methylation sites positions (given by middle N of NGANTCN) are indicated with a vertical line ( $P_{mipZ}$ : site ranked 12<sup>th</sup> is at +4 and site ranked 3<sup>rd</sup> is at +12 ;  $P_{ftsZ}$ : site ranked 3<sup>rd</sup> is at -21 and site ranked #22 is at -73). (D) Ranking of the 32 NGANTCN sequences based on the average ChIP enrichment of GcrA at all non-promoter regions harboring each sequence; also see Fig. 3C. (E) GcrA binding curves for the probes indicated: methylated  $P_{cckA}$ , unmethylated  $P_{cckA}$ , and methylated  $P_{cckA}$  mutated to have low-ranking methylation sites,  $P_{cckA}(LM)$ . Sequences surrounding the methylation sites in  $P_{cckA}$  and  $P_{cckA}(LM)$  and their ranks are indicated. Location of transcription start site is given for reference, methylation site ranked 3<sup>rd</sup> is at +13. The average for three replicates with SD is shown. (F) Histograms of the GcrA: $\sigma^{70}$  ChIP ratios at  $\sigma^{70}$  promoters. Ratios were computed at all transcription start sites mapped with  $\sigma^{70}$  signal > 6 rpm.

**Figure S4. Kinetic analysis of open complex formation by RNAP holoenzyme and GcrA on the *cckA* promoter.** Multiple-round *in vitro* transcription from the methylated *mipZ* promoter using the indicated probe (right). Methylation sites positions (given by middle N of NGANTCN) are indicated with a vertical line (site ranked 12<sup>th</sup> is at +4 and site ranked 3<sup>rd</sup> is at +12). Probe 2 is the same probe used in Fig. 4.

**Figure S5. GcrA affects expression of cell division genes.** (A) Histogram of the GcrA: $\sigma^{70}$  ChIP ratios at  $\sigma^{70}$  promoters in rifampicin-treated cells. A normal distribution (blue) was fitted to the left side of the histogram and the threshold  $2^{-0.5}$  used to define a high GcrA: $\sigma^{70}$  ratio shown in red. (B) Representation of the overlap between the GcrA regulon promoters and promoters that are induced at the swarmer-to-stalk transition and down-regulated in GcrA-depleted cells. Swarmer-to-stalked cell regulated promoters were identified as described in the supplemental Materials and Methods. (C) Gene expression for the CtrA regulon in GcrA-depleted cells / wild-

type cells at three cell-cycle timepoints. (D) Gene expression for known cell division genes in GcrA-depleted cells / wild-type cells at three cell-cycle timepoints.

**Figure S6. Ectopic induction of *ftsZ* or *ftsN* does not complement a GcrA depletion.** (A) Representative time-lapse images of wild-type and GcrA-depleted cells with TetR-mCerulean-labeled origins of replication; see Fig. 6C for summary data. (B) Growth of the *gcrA* depletion strain harboring the additional plasmids indicated, assessed by 10-fold serial dilutions on PYE xylose (to induce expression from plasmids) plates +/- vanillate. (C) Growth curve of a *gcrA* depletion strain ( $\Delta gcrA$ ,  $P_{van-gcrA}$ ). Cells were washed 3 times in PYE prior to release in PYE +/- vanillate. (D) Western blot for GcrA and RpoA during a GcrA depletion ( $\Delta gcrA$ ,  $P_{van-gcrA}$ ). Cells were washed 3 times in PYE prior to release in PYE and samples were taken at the indicated timepoints. (E) Western blot for GcrA and RpoA (loading control) for the strains tested in Fig. 6A. (F) Representative time-lapse images of *pstS::Tn5* and GcrA-depleted *pstS::Tn5* cells with TetR-mCerulean-labeled origins of replication. (G-H) Normalized histogram of times between successive replication initiations (G) and times between replication and division (H) in wild-type and GcrA-depleted cells. Median values are listed above.

## Supplemental Materials and Methods

### Bacterial strains and growth conditions

All strains used are listed in Table S4. *Caulobacter* strains were grown in PYE (rich medium) at 30 °C unless otherwise noted. Induction from the  $P_{xyl}$ ,  $P_{van}$ , and  $P_{lac}$  promoters was achieved by supplementing media with xylose (0.3%), vanillate (500  $\mu$ M), or IPTG (1  $\mu$ M), respectively. Antibiotics were used at the following concentrations (liquid /plates): oxytetracycline (1  $\mu$ g mL<sup>-1</sup> / 2  $\mu$ g mL<sup>-1</sup>), spectinomycin (25  $\mu$ g mL<sup>-1</sup> / 200  $\mu$ g mL<sup>-1</sup>), kanamycin (5  $\mu$ g mL<sup>-1</sup> / 25  $\mu$ g mL<sup>-1</sup>), gentamycin (NA / 5  $\mu$ g mL<sup>-1</sup>). *E. coli* strains were grown in LB medium at 37 °C unless otherwise indicated; when necessary, media were supplemented with the following antibiotic concentrations (liquid/plates): kanamycin (30  $\mu$ g mL<sup>-1</sup> / 50  $\mu$ g mL<sup>-1</sup>), spectinomycin (50  $\mu$ g mL<sup>-1</sup>), oxytetracycline (12  $\mu$ g mL<sup>-1</sup>), gentamycin (15  $\mu$ g mL<sup>-1</sup> / 20  $\mu$ g mL<sup>-1</sup>), carbenicillin (50  $\mu$ g mL<sup>-1</sup> / 100  $\mu$ g mL<sup>-1</sup>).

### Strain and plasmid construction

*Strain construction:* All plasmids and primers used are listed in Tables S5 and S6, respectively. Deletions were constructed via a two-step recombination method using *sacB* as a counter-selection marker (Skerker et al. 2005). Strain ML2296, a  $P_{xyl}$ -*gcrA* depletion strain, was constructed by first electroporating plasmid pMT585-*gcrA* into CB15N and selecting on kanamycin plates for integration at the xylose locus. The site of integration was confirmed by PCR using primers Rec-Uni and RecXyl-2 (Thanbichler et al. 2007). Next, plasmid pNPTS-spec-UP-tet-DW(*gcrA*) was introduced by electroporation and first integrants at the *gcrA* locus were selected on spectinomycin, tetracycline, and kanamycin. A second recombination step to select for plasmid excision was performed by growing first integrants overnight in PYE containing xylose and kanamycin. 1  $\mu$ L of the overnight culture was plated on sucrose, tetracycline, and xylose. Sucrose resistant clones were restreaked to test for loss of spectinomycin resistance, indicative of plasmid excision, on plates containing spectinomycin and xylose. Clones were further verified by PCR using primers OL69 and OL70, which anneal outside the homology region found on the plasmid.

Strains ML2297 and ML2302 were constructed by transducing  $\Delta$ *gcrA*(*tet*<sup>R</sup>) from ML2296 into a strain containing pMT585-*gcrA*-3xFLAG integrated at the xylose locus or pMT552-*gcrA*

integrated at the vanillate locus, and selecting on tetracycline + xylose or tetracycline + vanillate, respectively. Phage transductions were performed as previously described (Ely 1991). ML2305 was constructed similarly by transducing  $\Delta gcrA(spec^R)$  from LS3707 into a strain containing pMT644-*gcrA* integrated at the vanillate locus and selecting on spectinomycin + vanillate. All transductants were verified by PCR using primers OL69 and OL70.

Strains ML2298, ML2299, ML2300, ML2301, and ML2315 were constructed via single recombination and kanamycin selection with electroporated plasmids pNPTS138-*gcrA-3xFLAG*, pNPTS138-*rpoC-3xFLAG*, pNPTS138-*rpoH-3xFLAG*, pNPTS138-*rpoN-3xFLAG*, and pNPTS138-*rpoC-His<sub>10</sub>*, respectively. All resulting clones were verified by PCR with a primer annealing outside the homology region found on the plasmid and a primer annealing to the FLAG or His<sub>10</sub> tag coding sequence.

Strains ML2475, ML2476, ML2477 were constructed via single recombination and kanamycin selection with electroporated plasmids pNPTS138-*P<sub>mipz</sub>-venus*, pNPTS138-*P<sub>mipz</sub>(LM)-venus* and pNPTS138-*P<sub>mipz</sub>(NM)-venus*, respectively. All resulting clones were verified by PCR with a primer annealing outside the homology region to CCNA\_02236 found on the plasmid and a primer annealing to the Venus coding sequence.

Strain ML2303 (kind gift of C. Aakre), a *spoT* deletion strain, was constructed via two-step recombination. First integrants of the pNPTS-138- $\Delta spoT$  integration vector were selected on kanamycin. A second recombination step to select for plasmid excision was performed by growing first integrants overnight in PYE. 1  $\mu$ L of the overnight culture was plated on sucrose and sucrose resistant clones were restreaked to test for loss of kanamycin resistance, indicative of plasmid excision. Clones were further verified by PCR using primers (CAP173-CAP174) annealing outside the homology region found on the plasmid. Strain ML2304 was obtained by two successive transductions of *P<sub>van</sub>-gcrA(kan<sup>R</sup>)* from ML2302 and  $\Delta gcrA(spec^R)$  from ML2305 followed by transformation of the plasmid pMR20-*P<sub>lacI</sub>-lacI-P<sub>lac</sub>-spoT(H67A)*.

Strain ML2316 was constructed by transduction of *pstS::Tn<sup>S</sup>* (YB767) into ML2305.

Strain ML2317 (kind gift of C. Aakre) was constructed by transduction of the *Cori::tetO(gent<sup>R</sup>)* from strain ML1678 and two-step integration of the pNPTS138-*hfaAUP-P<sub>lacI</sub>-lacI-P<sub>lac</sub>-tetR-mCerulean-hfaADW* integration vector at the *hfaA* locus. Strain ML2318 was constructed by

integration of  $P_{van-gcrA}(rif^R)$  (pMT561-*gcrA*) at the vanillate locus in strain ML2317 followed by transduction of  $\Delta gcrA(tet^R)$  from ML2302. Strains ML2319 and ML2320 were constructed by transduction of *pstS::Tn<sup>5</sup>* (YB767) into ML2317 and ML2318, respectively.

Strains ML2306-ML2314 were constructed by electroporation of the appropriate pMT375 variant (see Table S5) into ML2305 and selection on tetracycline, spectinomycin, and vanillate. All bacterial two-hybrid strains (ML2321-ML2369) were obtained by co-transformation of the appropriate plasmid pairs into *E. coli* BTH101 with selection on kanamycin and carbenicillin. All strains for protein expression and purification (ML2370-ML2378) were generated by electroporation of the appropriate plasmids into BL21DE3 pLysS cells.

*Integration plasmids:* The pNPTS-spec-UP-tet-DW(*gcrA*) integration vector was constructed by amplifying homology regions upstream and downstream (~600 bp) of the *gcrA* coding sequence using primer pairs OL3\_up\_*gcrA*\_F, OL4\_up\_*gcrA*\_R and OL5\_dw\_*gcrA*\_F, OL6\_dw\_*gcrA*\_R. The tetracycline (*tet*) resistance cassette was amplified from template pKO3 using primer pair OL7\_tet\_F, OL8\_tet\_R. The upstream homology fragment was fused to the *tet* cassette by SOE-PCR using primers OL3\_up\_*gcrA*\_F and OL8\_tet\_R. This PCR product was then fused to the downstream homology region by SOE-PCR using primers OL3\_up\_*gcrA*\_F and OL6\_dw\_*gcrA*\_R. The resulting PCR product was cloned into the pENTR vector using the pENTR/D-TOPO cloning system (Life Technologies) and then recombined into the pNPTS-spec-DEST vector.

The pNPTS138-*gcrA*-3xFLAG integration vector to introduce a 3xFLAG tag at the C-terminus of the *gcrA* coding sequence was constructed by amplifying a homology region of the C-terminus of *gcrA* (~500 bp) using primer pair GcrA-3xFLAGSOE-CTERM-R, HindIII-GcrActerm3xFLAG\_F. This PCR product was fused to the 3xFLAG coding sequence using primers HindIII-GcrActerm3xFLAG\_F and 3xFLAG-SACI-R, and then amplified with primers 3xFLAG-F, 3xFLAG-SACI-R. The resulting product was digested with HindIII and SacI and cloned into the pNPTS138 vector digested with the same enzymes. The pNPTS138-*rpoC*-3xFLAG, pNPTS138-*rpoH*-3xFLAG and pNPTS138-*rpoN*-3xFLAG plasmids were constructed using the same strategy (~700 bp homology region) with primer pairs (*rpoC*-HindIII-Cterm-F, Rev-*rpoC*3xFlag), (*rpoH*-HindIII-3x-F, *rpoH*-3x-Flag-R), and (*RpoN*-HindIII-3x-F, *rpoN*-3x-R), respectively, and (3xFLAG-F, Rev-3xFlag-EcoRI) for 3xFLAG amplification and cloned using

HindIII and EcoRI restriction sites. The *pNPTS138-rpoC-His<sub>10</sub>* was constructed by two consecutive PCR reactions using primers rpoC-HindIII-Cterm-F, rpoC-R1linker and then primers rpoC-HindIII-Cterm-F, rpoC-R2linker-10His) followed by cloning into pNPTS138 using the HindIII and EcoRI restriction sites.

The pNPTS138-*P<sub>mipZ</sub>-venus*, pNPTS138-*P<sub>mipZ</sub>(LM)-venus* and pNPTS138-*P<sub>mipZ</sub>(NM)-venus* integration vectors to introduce reporter genes for wild-type and mutant *mipZ* promoters near the endogenous *mipZ* locus were constructed by amplifying a homology region for the CCNA\_02236 gene using primer pair 2236-F-HindIII and 2236-R-fuse-mipZ. This was then fused by SOE-PCR to the *mipZ* promoter sequence (or mutant *mipZ* promoter sequence, see DNA probe construction for details on how the mutations were introduced) amplified with primer pair FB-mipz-F and PmipZ-R-fuse-Venus and to the *Venus* coding sequence amplified with primers Venus-F and Venus-R-NheI. The resulting fragment was cloned using HindIII and NheI restriction sites into pNPTS138.

The pNPTS138- $\Delta$ *spoT* integration vector (C.Aakre) was constructed by amplifying homology regions upstream and downstream (~600 bp) of the *spoT* coding sequence using primer pairs (CAP133, CAP134) and (CAP135, CAP136) followed by SLIC cloning into pNPTS138 digested at the HindIII and EcoRI restriction sites.

Plasmids pMT585-*gcrA*, pMT552-*gcrA*, pMT644-*gcrA* and pMT561-*gcrA* were generated by cloning the PCR product amplified by primers OL17\_NdeI\_gcrA\_F, OL18\_SacI\_gcrA\_R and digested with NdeI and SacI into the digested vectors pMT585, pMT552, pMT644 and pMT561, respectively. The plasmid pMT585-*gcrA-3xFLAG* was constructed similarly except with the final PCR product obtained from SOE-PCR amplification of the *gcrA* coding sequence using primers OL17\_NdeI\_gcrA\_F and GcrA-3xFLAGSOE-CTERM-R, and the 3xFLAG coding sequence using primers 3xFLAG-F and 3xFLAG-SACI-R. All plasmids were sequence verified.

The pNPTS138-hfaAUP-*P<sub>lacI</sub>-lacI-P<sub>lac</sub>-tetR-mCerulean-hfaADW* integration vector (C.Aakre) was constructed by SLIC cloning into pNPTS138 digested with HindIII and EcoRI of three PCR fragments, 600 bp upstream of the hfaA locus, the *P<sub>lacI</sub>-lacI-P<sub>lac</sub>-tetR-mCerulean* and 600 bp downstream of the hfaA locus amplified with primer pairs (CAP94, CAP95), (CAP96, CAP140) and (CAP139, CAP99), respectively. The *P<sub>lacI</sub>-lacI-P<sub>lac</sub>-tetR-mCerulean* PCR fragment was



constructed by successive rounds of SOE-PCR with PCR fragments  $P_{lacI-lacI-P_{lac}}$  (CAP96, CAP137), tetR (CAP138, CAP60) and mCerulean (CAP61, CAP140).

*Replicative plasmids:* All pMT375-based plasmids were constructed using restriction sites NdeI and SacI. PCR products cloned into pMT375-*ftsN*, pMT375-*ftsZ*, pMT375-*gcrA*, were amplified with the following primer pairs: (FtsN-NdeI-F, FtsN-SacI-R), (NdeI-FtsZ-F, FtsZ-R-SacI), (OL17\_NdeI\_gcrA\_F, OL18\_SacI\_gcrA\_R), (OL17\_NdeI\_gcrA\_F, GcrA-Nterm-R321-SacI), and (GcrA-Cterm-151-F-NdeI, OL18\_SacI\_gcrA\_R), respectively. pMT375-*gcrA*<sub>1-107</sub>-3xFLAG, and pMT375-*gcrA*<sub>51-173</sub>-3xFLAG were constructed by a first amplification with the following primers (OL17\_NdeI\_gcrA\_F, NL-fuse3Xflag), and (GcrA-Cterm-151-F-NdeI, GcrA-3xFLAGSOE-CTERM-R) followed by SOE-PCR with the 3xFLAG fragment as described above for integration plasmids.

The plasmid pCT133- $P_{lacI-lacI-P_{lac-spoT(H67A)}}$  (kind gift of C.Aakre) was constructed in three steps. First, the plasmid pENTR- $P_{lacI-lacI-P_{lac-spoT}}$  was obtained by SLIC cloning with PCR fragments amplified with primer pairs (CAP66, CAP391 using *E. coli* DNA as template) and (CAP392, CAP393) and a modified pENTR vector containing a multiple cloning site digested with XmaI and EcoRI. Second, site-directed mutagenesis was performed on pENTR- $P_{lacI-lacI-P_{lac-spoT}}$  to introduce the H67A mutation using primer pair CAP394 and CAP395. Third, pENTR- $P_{lacI-lacI-P_{lac-spoT(H67A)}}$  was recombined into pCT133.

All bacterial two-hybrid plasmids were cloned using XbaI and KpnI restriction sites to introduce coding regions of interest. The PCR product to clone Chimera 1 of *Caulobacter* and *E. coli* domains 2 of  $\sigma^{70}$  (Fig. S2B) was constructed by successive rounds of SOE-PCR with PCR fragments amplified with primer pairs (sig70nt319-F, CC-159-R-fuse-EC139; *Caulobacter* DNA template), (EC139-F, EC349-R; *E. coli* DNA template) and (CC-390-F-fuse-EC349, rpoDaa484-R; *Caulobacter* DNA template). The PCR product to clone Chimera 2 of *Caulobacter* and *E. coli* domains 2 of  $\sigma^{70}$  (Fig. S2B) was constructed by successive rounds of SOE-PCR with PCR fragments amplified with primer pairs (89Ec-F-XbaI, EC138-R; *E. coli* DNA template), (CC-160-F-fuseEC138, 389CCfuse350EC-R; *Caulobacter* DNA template) and (350Ec-F, EC444-R-KpnI; *E. coli* DNA template).

All pET28b-based vectors containing *gcrA* variants were cloned using the PCR products used to generate pMT375 plasmids. pET28b-*His<sub>6</sub>-rpoD*, pET28b-*His<sub>6</sub>-rpoH*, pET28b-*His<sub>6</sub>-rpoN* and pET28b-*His<sub>6</sub>-ccrM* were constructed by PCR amplifying with primer pairs (RpoD-pet28-NdeI-F, rpoD-pet28-HindIII-R), (rpoH-pet28-NdeI-F, rpoH-pet28-HindIII-R), (rpoN-pet28-NdeI-F, rpoN-pet28-HindIII-R) and (ccrM-NdeI-F, ccrM-EcoRI-R). pGEX-4T2-GcrA was cloned by PCR amplification of the *gcrA* coding sequence with (F-GcrA-BamHI, R-GcrA-Sall) and ligated into pGEX-4T2 (kind gift of D. Barthelme).

### **Chromatin Immunoprecipitation Sequencing (ChIP-Seq)**

Bacterial cell cultures (20 mL) were grown to mid-exponential phase (OD ~0.3) and fixed by the addition of sodium phosphate (pH 7.6) and formaldehyde to a final concentration of 10 mM and 1%, respectively. When treated with rifampicin, cells were incubated with 25  $\mu\text{g mL}^{-1}$  rifampicin for 30 minutes prior to being fixed. Fixed cells were incubated at room temperature (RT) for 10 minutes and quenched with 0.1 M glycine for 5 min at RT followed by 15 min on ice. Cells were washed three times with 1X PBS (pH 7.4) and resuspended in 500  $\mu\text{L}$  of TES buffer (10 mM Tris-HCl (pH 7.5), 1 mM EDTA, 100 mM NaCl) to which 1  $\mu\text{L}$  of (35,000 U/ $\mu\text{L}$ ) Ready-Lyse (Epicentre) was added. Following 15 min incubation at RT, 500  $\mu\text{L}$  of ChIP buffer (16.7 mM Tris-HCl (pH 8.1), 167 mM NaCl, 1.1% Triton X-100, 1.2 mM EDTA) containing protease inhibitors (Roche cOmplete EDTA-free tablets) was added. After 10 min at 37 °C, the lysates were sonicated on ice and cell debris cleared by centrifugation. Supernatant protein concentration was measured by Bradford assay (Thermo Scientific) and 500  $\mu\text{g}$  of proteins were diluted into 1 mL of ChIP buffer + 0.01% SDS. The diluted supernatants were pre-cleared for 1 hr at 4 °C on a rotator with 50  $\mu\text{L}$  of Protein-A dynabeads (Life Technologies) pre-blocked overnight in ChIP buffer + 0.01% SDS and 100  $\mu\text{g}$  BSA. Beads were pelleted and 90  $\mu\text{L}$  of the supernatant was removed as input DNA and stored at -80 °C, the remaining pre-cleared supernatant was incubated rotating at 4 °C overnight with a specific antibody (Flag antibody 1:200 (Sigma Aldrich) or monoclonal RpoD antibody 1:166 (Neoclone, #WP004)). The immune complexes were captured for 2 hr at 4 °C with 50  $\mu\text{L}$  of pre-blocked Protein-A dynabeads. Beads were then washed consecutively at 4 °C for 15 min with 1 mL of the following buffers: low salt wash buffer (0.1% SDS, 1% Triton X-100, 2 mM EDTA, 20 mM Tris-HCl (pH 8.1), 150 mM NaCl), high salt wash buffer (0.1% SDS, 1% Triton X-100, 2 mM EDTA, 20 mM Tris-HCl (pH

8.1), 500 mM NaCl), LiCl wash buffer (0.25 M LiCl, 1% NP-40, 1% deoxycholate, 1 mM EDTA, 10 mM Tris-HCl (pH 8.1) and twice with TE buffer (10 mM Tris-HCl (pH 8.1), 1 mM EDTA). Complexes were then eluted twice from the beads with 250  $\mu$ L of freshly prepared elution buffer (1% SDS, 0.1 M NaHCO<sub>3</sub>). For reverse-crosslinking, 300 mM of NaCl and 2  $\mu$ L of RNase A (0.5 mg / mL) (Qiagen) were added to the collective eluates which were incubated at 65 °C overnight. Samples were then incubated at 45 °C for 2 hr with 5  $\mu$ L of Proteinase-K (NEB, 20 mg / ml) in the presence of 40 mM EDTA (pH 8.0) and 40 mM Tris-HCl (pH 6.8). DNA from the samples was then extracted twice with phenol:chloroform:isoamyl alcohol (25:24:1) and subsequently precipitated by adding sodium acetate (pH 5.2), 100  $\mu$ g glycogen (Roche) and 1 volume of ice cold isopropanol, and stored at -20 °C overnight. DNA was pelleted and washed with 75% ethanol and resuspended in TE buffer (pH 8.0). Samples were analyzed by next-generation sequencing or qPCR.

### **Library generation and Illumina sequencing**

Library generation and Illumina sequencing were performed at the MIT BioMicro Center. Libraries were generated on a Beckman-Colter Genomics SPRIworks system using 200-400 bp size selection and amplified 12-16 cycles. Up to 13 samples were multiplexed on one lane in a 40 nts single-read flow cell using the HiSeq2000 or 70 nts single-read flow cell using the MiSeq. For a summary of strains and conditions for which ChIP-Seq was performed, see Table S7. For ChIP-Seq data, see Table S8.

### **ChIP-Seq Analysis**

*Data processing:* Reads were mapped to the *Caulobacter crescentus* NA1000 reference genome using BWA (Li and Durbin 2010). 750,000 uniquely mapping reads were taken for each sample. Read extension and pile-up was performed using the MACS software package 1.4.2 (Zhang et al. 2008) (with  $d=200$  and keeping all tags at the same location) yielding 10 bp genomic bins containing the number of reads. The data were further process using custom scripts written in Python 2.7.3. The data were smoothed by convolution with a Gaussian ( $\mu=0$ ,  $\sigma=50$ bp,  $x=(-200$  bp,  $+200$  bp)). The data were then normalized in reads per million (rpm).

*Peak-calling:* As the control data presents a uniform background, (except for a slight bias due to the fact that ChIP was performed on a mixed population of cells undergoing replication, resulting

in a modest enrichment in DNA near the origin of replication), we used a sliding window looking for local maxima to call peaks. Local maxima were scored as peaks if they were 2.3-fold above the mean of the control sample, which corresponds to 5 standard deviations above the mean. Promoters were mapped from the peak summits identified from the RNAP rifampicin-treated ChIP sample, in which RNAP is trapped at promoters.

*Normalization of ChIP-Seq data:* In Fig. 1C, ChIP-Seq signals for GcrA, RNAP and  $\sigma^{70}$  were normalized such that the average of the 20 largest peaks at promoters (promoters were identified from RNAP signal in rifampicin-treated cells) for each ChIP experiment was 1.0. Active  $\sigma^{70}$  promoters were selected above a threshold of 0.1 (in normalized signal) and sorted based on  $\sigma^{70}$  signal. GcrA, RNAP and  $\sigma^{70}$  signals for selected promoters were plotted over 1 kb centered at the promoter if the signal for at least one of the proteins was  $> 0.2$  normalized signal. In Figure 1D, ChIP-Seq signals were normalized as in Fig. 1C and a given promoter was classified as  $\sigma^{70}$ -,  $\sigma^{54}$ - or  $\sigma^{32}$ -dependent promoter based on the maximum of the normalized signals, with the condition that the normalized  $\sigma^{70}$  signal must be  $> 0.1$  for a  $\sigma^{70}$  promoter and  $< 0.1$  for a  $\sigma^{32}$  or  $\sigma^{54}$  promoter. Each promoter class was sorted based on the  $\sigma$  signal, and GcrA, RNAP and  $\sigma^{70}$ ,  $\sigma^{54}$  and  $\sigma^{32}$  signals for selected promoters were plotted over a 1 kb interval, centered at the promoter if the signal for at least one protein was  $> 0.2$ .

### **Identification of GcrA sequence binding specificity**

In Fig. 3B, 20 methylation sites were identified that had ChIP enrichment  $< 4$  rpm for RNAP and  $> 7.0$  rpm for GcrA. Methylation sites were excluded if they were in close proximity to other methylation sites or a promoter. A motif search was performed on these 20 sequences using MEME (Bailey et al. 2009). In Fig. 3C, the average ChIP enrichment for GcrA and  $\sigma^{70}$  for each of the 32 possible NGANTCN sequences was computed at non-promoter sequences (ChIP RNAP  $< 3$  rpm) using data from rif-treated cells. In Fig. 3E, 25 promoters with the highest ChIP GcrA: $\sigma^{70}$  ratios were isolated from a distribution computed from all  $\sigma^{70}$  promoters with  $\sigma^{70}$  signal  $> 6.0$  rpm. In Fig. 3F, ChIP GcrA: $\sigma^{70}$  ratios were computed at all transcription start sites mapped with  $\sigma^{70}$  signal  $> 6$  rpm.

## ChIP and Quantitative PCR analysis

In Fig. 2G, ChIP was performed as detailed above on strains ML2308, ML2312, ML2313, and ML2314 that had been depleted for 2 hours of untagged GcrA (cells were washed three times with PYE and released in PYE without vanillate) and then induced for two more hours by addition of 0.3% xylose to express a 3xFLAG tagged variant of GcrA or harboring an empty vector. For each sample, two ChIP reactions were performed for GcrA and  $\sigma^{70}$  using an anti-FLAG antibody and an anti- $\sigma^{70}$  antibody, respectively. Quantitative PCR was performed with SYBR Green (Roche) on a Lightcycler 480 system (Roche). Each reaction contained 5  $\mu$ L SYBR Green Master, 1  $\mu$ L DNA (diluted 1:500 for pre-ChIP input DNA, and 1:10 for post-ChIP output DNA), 0.5  $\mu$ L primer mix at 10  $\mu$ M, and 3.5  $\mu$ L nuclease-free water. Amplification of a region within the *ruvA* coding sequence was used as a control. Cycle threshold values were calculated using the Lightcycler 480 software and converted to DNA concentrations based on a standard curve generated from 3-fold dilutions of *Caulobacter* genomic DNA. Fold enrichment values were calculated as:

$$\left(\frac{[\text{OUTPUT}(\text{P}_{\text{of interest}})]}{[\text{OUTPUT}(\text{ruvA})]}\right) / \left(\frac{[\text{INPUT}(\text{P}_{\text{of interest}})]}{[\text{INPUT}(\text{ruvA})]}\right).$$

The GcrA: $\sigma^{70}$  enrichment ratio was then calculated and normalized to the GcrA: $\sigma^{70}$  enrichment ratio calculated for the empty vector sample. Error bars were generated from two biological replicates and represent the standard deviation.

## Protein expression and purification

*Caulobacter RNAP*: The purification protocol for RNAP was adapted from (Anthony et al. 2000). 10 L of *Caulobacter* ML2315 expressing RpoC-His<sub>10</sub> from the native *rpoC* locus were grown in PYE to an OD<sub>600</sub> of 0.4-0.6 and harvested by centrifugation. Cell pellets were resuspended in 40 mL lysis buffer P (300 mM NaCl, 50 mM Na<sub>2</sub>HPO<sub>3</sub>/NaH<sub>2</sub>PO<sub>3</sub> (pH 8.0), 3 mM 2-mercaptoethanol, 5% glycerol) supplemented with cOmplete EDTA-free protease inhibitor cocktail (Roche), 40 mg lysozyme (Thermo Scientific) and 400 U benzonase (Novagen) and lysed by sonication. Lysates were cleared by centrifugation at 17,000 g for 45 min and then bound to Ni-NTA agarose (Qiagen) for 1 hr at 4 °C on a rotator in batch format. The resin was then washed with 40 mL of lysis buffer P, followed by 40 mL of lysis buffer P + 60 mM imidazole. RNAP was eluted in 2.5 mL of lysis buffer P + 250 mM imidazole and buffer

exchanged into TGED + 150 mM NaCl (50 mM Tris-HCl (pH 8.0), 5% glycerol, 0.1 mM EDTA, 0.1 mM DTT) on a PD-10 column (GE Healthcare). A second purification step was performed on a size exclusion column (16/600 Superdex 200 GE Healthcare) equilibrated with TGED + 150 mM NaCl. Fractions containing RNAP verified by Coomassie staining were pooled and run on a Mono Q Ion-Exchange chromatography column (Mono Q 10/100 GE Healthcare) pre-equilibrated with TGED + 150 mM NaCl. RNAP was eluted with a linear gradient up to TGED + 0.5 M NaCl over 15 column volumes. This yielded two separate peaks corresponding to RNAP core and RNAP holoenzyme as confirmed by Western blotting with anti-His, RpoA, and RpoD antibodies. Fractions from each peak were pooled, concentrated, buffer exchanged on an Amicon 3K Centrifugal filter unit (Millipore) into storage buffer (50 mM Tris-HCl (pH 8.0), 150 mM NaCl, 50% glycerol, 3 mM 2-mercaptoethanol) and stored at -20 °C. Protein concentration was measured by Bradford assay (Thermo Scientific).

*His<sub>6</sub>-tagged proteins:* For His<sub>6</sub>-GcrA and His<sub>6</sub>-CcrM, cells were grown to OD<sub>600</sub> ~ 0.5 at 37 °C and induced with 0.3 mM IPTG for 4 hr at 30 °C. For His<sub>6</sub>-RpoD, His<sub>6</sub>-RpoN, and His<sub>6</sub>-RpoH, cells were induced overnight at 18 °C. Cells were harvested by centrifugation and resuspended in 20 mL lysis buffer (20 mM Tris-HCl (pH 7.9), 0.5 M NaCl, 0.1% Triton X-100, 10% glycerol) per liter of culture supplemented with 20 mg of lysozyme, 1 mM PMSF and 200 U benzonase (Novagen). Cells were lysed by sonication and cell debris cleared by centrifugation for 45 min at 17,000 g. Cleared lysates were bound to Ni-NTA agarose resin (Qiagen) for 30 min in batch format at 4 °C. Resin was washed twice with wash buffer (20 mM Hepes-KOH (pH 8.0), 0.5 M NaCl, 0.1% Triton X-100, 10% glycerol, 20 mM Imidazole) and proteins were eluted in 2.5 mL of elution buffer (20 mM Hepes-KOH (pH 8.0), 0.5 M NaCl, 10% glycerol, 250 mM imidazole) and buffer exchanged on PD-10 columns (GE Healthcare) into storage buffer. Storage buffer for His<sub>6</sub>-RpoD, His<sub>6</sub>-RpoH, and His<sub>6</sub>-RpoN was 10 mM HEPES-KOH (pH 8.0), 50 mM KCl, 10% glycerol, 1 mM DTT, 0.1 mM EDTA), for His<sub>6</sub>-CcrM it was 50 mM HEPES (pH 7.5), 200 mM NaCl, 0.1 mM DTT, 10% glycerol, and for His<sub>6</sub>-GcrA it was 50 mM Tris-HCl (pH 8.5), 200 mM NaCl, 5 % glycerol. His<sub>6</sub>-GcrA was further purified on a size exclusion column (16/600 Superdex 75, GE Healthcare) pre-equilibrated with GcrA storage buffer. Fractions containing His<sub>6</sub>-GcrA were verified by Coomassie staining, pooled, and concentrated on an Amicon 10K Centrifugal filter unit (Millipore). Proteins were stored at -80 °C.

*GST-tagged proteins:* GST-GcrA and GST proteins were induced and purified in a similar manner as His<sub>6</sub>-tagged proteins except that lysates were bound to 500  $\mu$ L glutathione sepharose 4B beads (GE Healthcare) for 1 hr. Proteins were eluted in elution buffer (50 mM Tris-HCl (pH 8.0), 10 mM reduced glutathione) and buffer exchanged into GcrA storage buffer.

### **Antibody production**

Rabbit polyclonal antisera (Covance) were generated from purified His<sub>6</sub>-GcrA from which the His<sub>6</sub> tag was removed by digestion with TEV protease.

### **Affinity Chromatography**

100  $\mu$ L of pre-washed glutathione sepharose 4B beads (GE Healthcare) in binding buffer (50 mM HEPES-KOH (pH 7.5), 100 mM KCl, 0.1 mM EDTA, 2.5 mM MgCl<sub>2</sub>, 3 % glycerol, 0.1 % Triton X-100) were incubated with 1 mg of GST-tagged protein for 1 hr at 4 °C with rotation. Beads were washed twice with 1 mL of binding buffer and then cleared WT *Caulobacter* lysate (Fig. 2A) (from 100 mL of cells grown to OD<sub>600</sub> ~ 0.3 and lysed by sonication in binding buffer supplemented with lysozyme, benzonase, and cComplete protease inhibitor cocktail (Roche)) or 0.25 mg of purified bait protein (His<sub>6</sub>-RpoD, His<sub>6</sub>-RpoH, His<sub>6</sub>-RpoN) (Fig. 2E) was added. After incubation at 4 °C for 1 hr, beads were transferred to a 1 mL Bio-Spin chromatography column (Bio-Rad) and washed with 5 column volumes of binding buffer. Proteins were eluted three times with 50  $\mu$ L elution buffer (50 mM Tris-HCl (pH 8.0), 10 mM reduced glutathione). Eluates were pooled and analyzed by gel electrophoresis and coomassie staining or Western blotting.

### **Co-Immunoprecipitation**

1.5 L of strain ML2299 or CB15N grown to OD<sub>600</sub> ~ 0.5 were harvested by centrifugation and resuspended in lysis buffer (50 mM HEPES (pH 7.5), 150 mM KCl, 0.1 mM EDTA, 5 mM MgCl<sub>2</sub>, 5% glycerol). Cells were lysed by sonication and lysates were cleared by centrifugation at 17,000 g for 45 min. Cleared lysates were then bound to 200  $\mu$ L of pre-equilibrated anti-FLAG magnetic beads (Sigma-aldrich) for 2 hr at 4 °C with rotation. Beads were washed three times with binding buffer and immunoprecipitated proteins were eluted with 100  $\mu$ L of TBS (50 mM Tris-HCl (pH 7.4), 150 mM NaCl) buffer containing 100  $\mu$ g/mL of 3xFLAG peptide (Sigma-aldrich). Eluates were analyzed by Western blotting.

## DNA probe generation and labeling

*DNA probe construction:* Primers for probe amplification are listed in Table S6. Probes for the promoters of *ftsZ*, *mipZ* and *cckA* were PCR amplified with primer pairs (FB-ftsZ-F, FB-ftsZ-R), (FB-mipz-F, FB-mipz-R) and (FB-cckA-F, FB-cckA-R), respectively. Mutations in  $P_{mipZ}$  were introduced by SOE-PCR with primer pairs (FB-mipz-F, FB-mipZ-R-soe-mutants and FB-mipZ-G3TG6A-T0GG6T, FB-mipZ-R-soe-outside) for  $P_{mipZ}(LM)$  and (FB-mipz-F, FB-mipZ-R-soe-mutants and FB-mipZ-A4TG1C, FB-mipZ-R-soe-outside) for  $P_{mipZ}(NM)$ . Final PCR products were sequence verified and DNA probes were PCR amplified using the same primers as for the  $P_{mipZ}$  probe. Mutants of  $P_{cckA}$ ,  $P_{cckA}(LM)$  and  $P_{cckA}(NM)$ , were PCR with the same primers as for the  $P_{cckA}$  probe using ordered gblock (IDT) as templates. All probes were between 136 to 193 bp and centered at the promoter as defined from transcription start site mapping. Two to four PCR reactions were gel purified (Qiagen) and pooled.

*Methylation and probe labeling:* Probes were methylated for at least 4 hr in 100  $\mu$ L in the presence of purified His<sub>6</sub>-CcrM, as described previously (Albu et al. 2012). Methylation was verified by digestion with HinfI, which cuts unmethylated GANTC sites. To distinguish full-methylation from hemi-methylation we digested a methylated probe sensitive to ClaI in the unmethylated or hemi-methylated state but resistant if fully-methylated. No digestion was observed in the methylated state after ClaI incubation, indicating complete methylation. Methylation reactions were PCR purified (Qiagen) and resuspended in 30  $\mu$ L. Probes were labeled with T4-polynucleotide kinase (NEB) in 10  $\mu$ L reactions containing 7  $\mu$ L DNA, 1  $\mu$ L of radiolabeled  $\gamma$ -P<sup>32</sup> ATP, 1  $\mu$ L of T4-PNK, and 1  $\mu$ L of T4-PNK buffer at 37 °C for 90 min. Probes were then PCR purified and stored at -20 °C.

## Filter binding assays

*Open complex assay:* Kinetic assays were performed at 30 °C. Reaction mixes were made in which an individual time point reaction was 15  $\mu$ L including 8  $\mu$ L of *Caulobacter* RNAP holoenzyme diluted in transcription buffer (40 mM Tris-HCl, (pH 8.0), 100 mM NaCl, 10 mM MgCl<sub>2</sub>, 1.4% Tween-20, 50  $\mu$ g/mL BSA (Ambion), and 1 mM DTT) and 2  $\mu$ L of GcrA diluted in GcrA storage buffer. This was incubated for 10 min at 30 °C prior to addition of 5  $\mu$ L of labeled DNA (0.1-0.25 nM) diluted in (10 mM Tris-HCl, (pH 8.5)) and pre-incubated at 30 °C for 10 min. Aliquots (14  $\mu$ L) were removed at the indicated times and challenged with 2  $\mu$ L heparin (50



μg/mL final) for 20 seconds, bound to prewashed nitrocellulose filters (Millipore) and immediately washed with 4 x 1 mL of wash buffer (10 mM Tris-HCl (pH 8.0), 100 mM NaCl, 1 mM EDTA). Filters were then incubated in 4 mL of scintillation liquid (National Diagnostics) and counts were read on a scintillation counter Tri-Carb 2910 TR (Perkin Elmer).

Background counts were subtracted and the fraction of DNA retained on the filter was plotted versus time. 100% DNA retained on filter was determined from reactions containing saturating levels of GcrA (4μM) or RNAP (20nM) without heparin competition and filtered. Curves were fitted with a single exponential, and the association rate  $k_{obs}$  was corrected for fractional occupancy (Barker et al. 2001). Obtained  $k_{obs}$  were plotted versus RNAP concentration and  $K_B$  and  $k_i$  were estimated by fitting the resulting curves to  $k_{obs} = \frac{K_B * k_i * [RNAP]}{1 + K_B * [RNAP]}$  (Saecker et al. 2002).

As  $P_{cckA}$  forms short-lived open complexes,  $P_{cckA}$  kinetics were performed in presence of 1 mM ATP to stabilize the open complex (ATP is the substrate for the first two nucleotides) enabling more accurate measurements and therefore the 2 first NTP binding steps make a slight contribution to  $k_i$ .

*DNA binding assay:* 2 μL of GcrA diluted in GcrA storage buffer and 8 μL of transcription buffer (40 mM Tris-HCl (pH 8.0), 100 mM NaCl, 10 mM MgCl<sub>2</sub>, 1.4% Tween-20, 50 μg/mL BSA, and 1 mM DTT) were pre-incubated at 30 °C for 10 min. 5 μL of labeled DNA (1 nM) diluted in (10 mM Tris-HCl, (pH 8.5)) and pre-incubated at 30 °C for 10 min was added. Reactions were incubated at 30 °C for 5 min, bound to prewashed filters (Millipore) and immediately washed with 4 x 1 mL of wash buffer (10 mM Tris-HCl (pH 8.0), 100 mM NaCl, 1 mM EDTA). Counts were read similarly as in the open complex assays.  $K_d$  curves were fitted using the Prism software using one site specific binding with Hill slope and curves were normalized to the predicted  $B_{max}$ .

### **In vitro Transcription Assays**

All assays were performed at 30 °C. In single-round *in vitro* transcription (Fig. 5D), reaction mixes were made in which an individual time point reaction was 15 μL including 8 μL of *Caulobacter* RNAP holoenzyme diluted in transcription buffer (40 mM Tris-HCl, (pH 8.0), 100 mM NaCl, 10 mM MgCl<sub>2</sub>, 1.4% Tween-20, 50 μg/mL BSA (Ambion), and 1 mM DTT) and 2 μL of GcrA diluted in GcrA storage buffer. This was incubated for 10 min at 30 °C. 5 μL of

DNA (0.1-0.25 nM) diluted in (10 mM Tris-HCl, (pH 8.5)) and pre-incubated at 30 °C for 10 min was added. Aliquots (14 µL) were removed at indicated times and added to 2 µL of transcription start mix (heparin (50 µg/mL final), GTP (200 µM final), CTP (200 µM final), ATP (200 µM final), UTP (10 µM final), [ $\alpha$ -<sup>32</sup>P]UTP (2 µCi), 20 U SUPERase In RNase inhibitor (Life Technologies)) for 20 min. Reactions were stopped by addition of an equal volume of stop buffer Novex TBE-Urea (Life Technologies), electrophoresed on 10% TBE-Urea polyacrylamide gels (Life Technologies) and dried gels were visualized by phosphorimaging. Experiments were performed in duplicates, one representative gel is shown.

In multiple-round *in vitro* transcription (Fig 5B, 5E, S5A), reactions containing 8 µL of *Caulobacter* RNAP holoenzyme diluted in transcription buffer (40 mM Tris-HCl, (pH 8.0), 100 mM NaCl, 10 mM MgCl<sub>2</sub>, 1.4% Tween-20, 50 µg/mL BSA (Ambion), and 1 mM DTT) and 2 µL of GcrA diluted in GcrA storage buffer and 2µL of transcription start mix (GTP (200 µM final), CTP (200 µM final), ATP (200 µM final), UTP (10 µM final), [ $\alpha$ -<sup>32</sup>P]UTP (2 µCi), 20 U SUPERase In RNase inhibitor (Life Technologies)) were preincubated 30 °C for 10 min. 5 µL of DNA (0.25-0.5 nM) in 10 mM Tris-HCl, (pH 8.5) was then added to each reaction and reactions were stopped after 15 min by addition of an equal volume of stop buffer Novex TBE-Urea (Life Technologies), electrophoresed on 10% or 15% TBE-Urea polyacrylamide gels (Life Technologies) and dried gels were visualized by phosphorimaging. Quantifications were performed using ImageJ. Experiments were performed in duplicates, one representative gel is shown.

### **DNA Microarray Analysis**

Synchronies of CB15N or ML2302 were performed on 200 mL of exponential phase cultures using Percoll (GE Healthcare) density gradient centrifugation. To pre-deplete for *gcrA*, ML2302 cells were washed three times in PYE and resuspended in PYE without vanillate for 30 min prior to synchrony. After synchrony, cells were resuspended in PYE and RNA collected at the appropriate cell-cycle time-point. RNA was extracted using the RNeasy mini kit (Qiagen). The generation of cDNA and hybridization to custom Agilent arrays was performed as described previously (Gora et al. 2010). To eliminate defective probes from the array we removed outlier probes that had values more than 5 standard deviations away from the mean of the other probes for that gene. 10% of the mean was used as a lower bound for the standard deviation. In the case

of a defective probe it was excluded for all arrays. Array values for all genes are given in Table 1.

### **Transcription start site mapping and open reading frame matching**

Transcription start sites (TSS) were mapped using genome-wide 5' mRNA data (Schrader et al. 2014). Briefly, a sliding window was used to find local increase (step function) on the forward or reverse strands of the 5' mRNA data on either side (100 bp) of a promoter identified from the rif-treated RNAP ChIP peaks. The highest local increase was selected if above a certain threshold (count=8). The transcription start site was then matched to the nearest open reading frame on the same strand (up to 400 bp upstream and 150 bp downstream of the annotated open reading frame start). This process was hand-curated at the promoters of genes that are down-regulated in GcrA-depleted cells for which a promoter was not identified. The list of all TSS used for analysis related to Fig. 5 is listed in Table S2.

### **Defining the GcrA regulon**

The GcrA regulon was defined based on genes fulfilling three criteria: (i) at least 1.75-fold lower expression levels in GcrA-depleted cells at 30 or 45 min post-synchrony compared to wild-type. However, genes whose down-regulation at 60 min was 1.25-fold greater than the down-regulation at 30 or 45 min post-synchrony were excluded because GcrA is maximally abundant at 30 and 45 min post-synchrony (Fig. 5A) and GcrA targets were expected to be maximally affected at the 30 and 45 min time points; (ii) a GcrA: $\sigma^{70}$  ChIP enrichment ratio from rif-treated cells  $> 2^{0.5}$  at the gene's promoter; (iii) a promoter-proximal GANTC site (within 40 base pairs of the TSS). We used the rifampicin-treated ChIP data rather than the non-rif treated data to compute the GcrA: $\sigma^{70}$  ChIP enrichment ratio used to identify the GcrA regulon for two reasons: (i) More promoters have  $\sigma^{70}$  signal in rif-treated cells which allowed us to compute the ratio at more promoters, (promoters were identified as having a peak in the RNAP rif-treated ChIP (see above, transcription start site mapping and open reading frame matching)). (ii) The rif-treated data allowed the capture of more subtle effects as there were more promoters with a high GcrA: $\sigma^{70}$  ChIP enrichment ratio in the rif-treated sample compared to the non-rif treated sample. Additionally, the promoters that were above the high ratio threshold only in the rif-treated but not in the non-rif treated showed a distribution of changes in gene expression in GcrA-depleted cells different than promoters with low GcrA: $\sigma^{70}$  ChIP ratio whereas promoters that were above

the high ratio threshold only in the non-rif treated sample did not show a difference. This indicates that the rif-treated sample contains more information and would lead to fewer false negatives. The GcrA regulon is summarized in Table S3.

### **Cell-cycle patterns of the GcrA regulon**

Cell-cycle expression patterns of genes in the GcrA regulon was taken from RNA-Seq data previously published (Fang et al. 2013). For each gene  $i$ , each RNA-Seq count value  $x_{i,j}$  at time

point  $j$  was normalized as:  $\log_2(x_{i,j}) - \frac{\sum_j \log_2(x_{i,j})}{n}$ .

Promoters activated at the swarmer-to-stalk transition (Fig. S5B) were identified using two criteria on the normalized data (Fang et al. 2013) (see normalization above): (i) a two-fold positive change at the swarmer-to-stalk transition (time point 0 and 1), (ii) a normalized swarmer time point  $< 0.0$ .

### **Bacterial two-hybrid assay**

Bacterial two-hybrid assays were performed as previously described (Aakre et al. 2013).

### **Immunoblotting**

Immunoblotting was performed as described previously (Jonas et al. 2013) with the following modifications: 10% or 12% Tris-HCl gels were used (Bio-Rad) and gels were imaged with a Typhoon scanner (GE Healthcare) or a FluorChem M Imager (ProteinSimple). Antibodies were used at the following concentrations: anti-RpoA (Neoclone #W0003, 1:7500), anti-RpoD (Neoclone #W0004, 1:3000), anti-GcrA (1:5000), anti-Venus (MA1-952 Life Technologies, 1:1000), anti-FLAG (Sigma-Aldrich, 1:5000).

### **Microscopy**

Phase contrast images and time-lapse movies were taken on a Zeiss Observer Z1 microscope using a 100x/1.4 oil immersion objective and an LED-based Colibri illumination system using software Metamorph (Universal Imaging, PA). For phase contrast images, cells were fixed with 0.5% paraformaldehyde, pelleted, and resuspended in PBS. Fixed cells were spotted onto PYE 1.5% agarose pads and imaged. Cells examined were in mid-exponential phase.

For time-lapse microscopy of strains ML2317-ML2320, cells induced with IPTG for 3 hours were placed on a 1.5% low-melting agarose pad made with PYE supplemented with IPTG and imaged in a glass-bottomed petri dish wrapped with Parafilm to prevent desiccation. To pre-deplete GcrA (ML2318, ML2320), cells were washed 3 times in PYE to remove the inducer vanillate, resuspended in PYE + IPTG and pre-depleted for 30 minutes prior to placing on the agarose pad. Pictures were taken every 8 minutes, and temperature was maintained at 30 °C using the Zeiss Temp Module S1 and Heating Insert P S1. Automatic focusing was performed using the Zeiss Definite Focus module. To perform cell segmentation and tracking, images were processed using MicrobeTracker (Sliusarenko et al. 2011). For wild-type cells, cell division events were scored using MicrobeTracker algorithm 4 with the modified parameters: areaMax = 950, splitThreshold = 0.5. For GcrA-depleted cells, algorithm 4 was used and division events were hand-curated. Origin of replication foci were detected using spotFinderZ and hand-curated using spotFinderM (Sliusarenko et al. 2011). The time between the initiation of replication to the next replication initiation (replication to replication time) was scored as the number of frames in between two replication events in a stalked cell lineage multiplied by 8 minutes (time between frames). An initiation of replication event was defined as the appearance of a second fluorescent focus indicating that the *tetO* array at the origin had been replicated. The time of replication to division was scored as the number of frames between the appearance of a second focus and the frame of cell division multiplied by 8 minutes. 110, 76, 59, 50 inter-replication events were counted for wt (ML2317), GcrA-depleted (ML2318), *pstS::Tn<sup>5</sup>* (ML2319), *pstS::Tn<sup>5</sup>* GcrA-depleted (ML2320), respectively. 149, 71, 94, 70 replication to division events were counted for wt (ML2317), GcrA-depleted (ML2318), *pstS::Tn<sup>5</sup>* (ML2319), *pstS::Tn<sup>5</sup>* GcrA-depleted (ML2320), respectively.

### **Flow Cytometry**

Flow cytometry was performed as described previously (Aakre et al. 2013).

### **Suppressor screen**

To screen for suppressors of *gcrA*, a *gcrA* depletion strain (ML2305) was transposon mutagenized using the EZ-Tn5 kit (Epicentre) and plated onto PYE medium containing kanamycin (to select for transposon integration). Colonies that grew after 2-4 days were isolated for genomic DNA extraction. To map transposon insertion sites, genomic DNA from putative

suppressor strains was digested, self-ligated, and transformed into *pir-116 E. coli*. Plasmids were prepped from the resulting transformants and sequenced using the Ez-Tn5 FP-1 forward primer.

## Supplemental References

- Aakre CD, Phung TN, Huang D, Laub MT. 2013. A bacterial toxin inhibits DNA replication elongation through a direct interaction with the  $\beta$  sliding clamp. *Mol Cell* **52**: 617–628.
- Albu RF, Jurkowski TP, Jeltsch A. 2012. The *Caulobacter crescentus* DNA-(adenine-N6)-methyltransferase CcrM methylates DNA in a distributive manner. *Nucleic Acids Res* **40**: 1708–1716.
- Anthony LC, Artsimovitch I, Svetlov V, Landick R, Burgess RR. 2000. Rapid purification of His(6)-tagged *Bacillus subtilis* core RNA polymerase. *Protein Expr Purif* **19**: 350–354.
- Bae B, Davis E, Brown D, Campbell EA, Wigneshweraraj S, Darst SA. 2013. Phage T7 Gp2 inhibition of *Escherichia coli* RNA polymerase involves misappropriation of  $\sigma$ 70 domain 1.1. *Proc Natl Acad Sci U S A* **110**: 19772–19777.
- Bailey TL, Boden M, Buske FA, Frith M, Grant CE, Clementi L, Ren J, Li WW, Noble WS. 2009. MEME SUITE: tools for motif discovery and searching. *Nucleic Acids Res* **37**: W202–208.
- Barker MM, Gaal T, Josaitis CA, Gourse RL. 2001. Mechanism of regulation of transcription initiation by ppGpp. I. Effects of ppGpp on transcription initiation in vivo and in vitro. *J Mol Biol* **305**: 673–688.
- Ely B. 1991. Genetics of *Caulobacter crescentus*. *Methods Enzymol* **204**: 372–384.
- Evinger M, Agabian N. 1977. Envelope-associated nucleoid from *Caulobacter crescentus* stalked and swarmer cells. *J Bacteriol* **132**: 294–301.
- Fang G, Passalacqua KD, Hocking J, Llopis PM, Gerstein M, Bergman NH, Jacobs-Wagner C. 2013. Transcriptomic and phylogenetic analysis of a bacterial cell cycle reveals strong associations between gene co-expression and evolution. *BMC Genomics* **14**: 450.
- Gonin M, Quardokus EM, O'Donnol D, Maddock J, Brun YV. Regulation of Stalk Elongation by Phosphate in *Caulobacter crescentus*. <http://jb.asm.org> (Accessed December 14, 2014).
- Gora KG, Tsokos CG, Chen YE, Srinivasan BS, Perchuk BS, Laub MT. 2010. A cell-type-specific protein-protein interaction modulates transcriptional activity of a master regulator in *Caulobacter crescentus*. *Mol Cell* **39**: 455–467.
- Holtzendorff J, Hung D, Brende P, Reisenauer A, Viollier PH, McAdams HH, Shapiro L. 2004. Oscillating global regulators control the genetic circuit driving a bacterial cell cycle. *Science* **304**: 983–987.
- Jonas K, Liu J, Chien P, Laub MT. 2013. Proteotoxic stress induces a cell-cycle arrest by stimulating Lon to degrade the replication initiator DnaA. *Cell* **154**: 623–636.

- Karimova G, Pidoux J, Ullmann A, Ladant D. 1998. A bacterial two-hybrid system based on a reconstituted signal transduction pathway. *Proc Natl Acad Sci U S A* **95**: 5752–5756.
- Li H, Durbin R. 2010. Fast and accurate long-read alignment with Burrows-Wheeler transform. *Bioinforma Oxf Engl* **26**: 589–595.
- Saecker RM, Tsodikov OV, McQuade KL, Schlax PE, Capp MW, Record MT. 2002. Kinetic studies and structural models of the association of E. coli sigma(70) RNA polymerase with the lambdaP(R) promoter: large scale conformational changes in forming the kinetically significant intermediates. *J Mol Biol* **319**: 649–671.
- Schrader JM, Zhou B, Li G-W, Lasker K, Childers WS, Williams B, Long T, Crosson S, McAdams HH, Weissman JS, et al. 2014. The coding and noncoding architecture of the *Caulobacter crescentus* genome. *PLoS Genet* **10**: e1004463.
- Skerker JM, Prasol MS, Perchuk BS, Biondi EG, Laub MT. 2005. Two-component signal transduction pathways regulating growth and cell cycle progression in a bacterium: a system-level analysis. *PLoS Biol* **3**: e334.
- Sliusarenko O, Heinritz J, Emonet T, Jacobs-Wagner C. 2011. High-throughput, subpixel precision analysis of bacterial morphogenesis and intracellular spatio-temporal dynamics. *Mol Microbiol* **80**: 612–627.
- Thanbichler M, Iniesta AA, Shapiro L. 2007. A comprehensive set of plasmids for vanillate- and xylose-inducible gene expression in *Caulobacter crescentus*. *Nucleic Acids Res* **35**: e137.
- Zhang Y, Liu T, Meyer CA, Eeckhoutte J, Johnson DS, Bernstein BE, Nusbaum C, Myers RM, Brown M, Li W, et al. 2008. Model-based analysis of ChIP-Seq (MACS). *Genome Biol* **9**: R137.



**Table S4: Strains**

| Name                                | Genotype                                                                                                                                                                           | Source                     |
|-------------------------------------|------------------------------------------------------------------------------------------------------------------------------------------------------------------------------------|----------------------------|
| <b><i>C. crescentus</i> strains</b> |                                                                                                                                                                                    |                            |
| CB15N                               | Synchronizable wild-type CB15                                                                                                                                                      | (Evinger and Agabian 1977) |
| LS3707                              | <i>gcrA(spec<sup>R</sup>); P<sub>xyl</sub>-gcrA(kan<sup>R</sup>)</i>                                                                                                               | (Holtzendorff et al. 2004) |
| ML2296                              | $\Delta gcrA(tet^R); P_{xyl}\text{-}gcrA(kan^R)$                                                                                                                                   | This study                 |
| ML2297                              | $\Delta gcrA(tet^R); P_{xyl}\text{-}gcrA\text{-}3xFLAG(kan^R)$                                                                                                                     | This study                 |
| ML2298                              | <i>gcrA::gcrA-3xFLAG(kan<sup>R</sup>)</i>                                                                                                                                          | This study                 |
| ML2299                              | <i>rpoC::rpoC-3xFLAG(kan<sup>R</sup>)</i>                                                                                                                                          | This study                 |
| ML2300                              | <i>rpoH::rpoH-3xFLAG(kan<sup>R</sup>)</i>                                                                                                                                          | This study                 |
| ML2301                              | <i>rpoN::rpoN-3xFLAG(kan<sup>R</sup>)</i>                                                                                                                                          | This study                 |
| ML2302                              | $\Delta gcrA(tet^R); P_{van}\text{-}gcrA(kan^R)$                                                                                                                                   | This study                 |
| ML2303                              | $\Delta spoT$                                                                                                                                                                      | Lab strain collection      |
| ML2304                              | $\Delta spoT \Delta gcrA(spec^R); P_{van}\text{-}gcrA(kan^R); pCT133\text{-}P_{lac}\text{-}lacI\text{-}P_{lac}\text{-}spoT(H67A)$                                                  | This study                 |
| ML2305                              | $\Delta gcrA(spec^R); P_{van}\text{-}gcrA(gent^R)$                                                                                                                                 | This study                 |
| ML2306                              | ML2305 pMT375- <i>ftsN</i>                                                                                                                                                         | This study                 |
| ML2307                              | ML2305 pMT375- <i>ftsZ</i>                                                                                                                                                         | This study                 |
| ML2308                              | ML2305 pMT375                                                                                                                                                                      | This study                 |
| ML2309                              | ML2305 pMT375- <i>gcrA</i>                                                                                                                                                         | This study                 |
| ML2312                              | ML2305 pMT375- <i>gcrA-3xFLAG</i>                                                                                                                                                  | This study                 |
| ML2313                              | ML2305 pMT375- <i>gcrA<sub>1-107</sub>-3xFLAG</i>                                                                                                                                  | This study                 |
| ML2314                              | ML2305 pMT375- <i>gcrA<sub>51-173</sub>-3xFLAG</i>                                                                                                                                 | This study                 |
| ML2315                              | <i>rpoC::rpoC-HIS<sub>10</sub>(kan<sup>R</sup>)</i>                                                                                                                                | This study                 |
| YB767                               | <i>pstS::Tn<sup>5</sup></i>                                                                                                                                                        | (Gonin et al.)             |
| ML2316                              | $\Delta gcrA(spec^R); P_{van}\text{-}gcrA(gent^R); pstS::Tn^5$                                                                                                                     | This study                 |
| ML1678                              | <i>Cori::tetO(gent<sup>R</sup>); (LacI-CFP and TetR-YFP)(spec<sup>R</sup>); integrated at xylX locus</i>                                                                           | Lab strain collection      |
| ML2317                              | <i>Cori::tetO(gent<sup>R</sup>); hfaA::P<sub>lac</sub>-lacI-P<sub>lac</sub>-tetR-mCerulean</i>                                                                                     | Lab strain collection      |
| ML2318                              | <i>Cori::tetO(gent<sup>R</sup>); hfaA::P<sub>lac</sub>-lacI-P<sub>lac</sub>-tetR-mCerulean; P<sub>van</sub>-gcrA(rif<sup>R</sup>); <math>\Delta gcrA(tet^R)</math></i>             | This study                 |
| ML2319                              | <i>Cori::tetO(gent<sup>R</sup>); hfaA::P<sub>lac</sub>-lacI-P<sub>lac</sub>-tetR-mCerulean; pstS::Tn<sup>5</sup></i>                                                               | This study                 |
| ML2320                              | <i>Cori::tetO(gent<sup>R</sup>); hfaA::P<sub>lac</sub>-lacI-P<sub>lac</sub>-tetR-mCerulean; P<sub>van</sub>-gcrA(rif<sup>R</sup>); <math>\Delta gcrA(tet^R); pstS::Tn^5</math></i> | This study                 |

|                               |                                                                  |            |
|-------------------------------|------------------------------------------------------------------|------------|
| ML2475                        | <i>CCNA_02236-P<sub>mipz</sub>-venus (kan<sup>R</sup>)</i>       | This study |
| ML2476                        | <i>CCNA_02236-P<sub>mipz(LM)</sub>-venus (kan<sup>R</sup>)</i>   | This study |
| ML2477                        | <i>CCNA_02236-P<sub>mipz(NM)</sub>-venus (kan<sup>R</sup>)</i>   | This study |
|                               |                                                                  |            |
| <b><i>E. coli strains</i></b> |                                                                  |            |
| DH5α                          | General cloning strain                                           | Invitrogen |
| TOP10                         | General cloning strain                                           | Invitrogen |
| BL21DE3 pLysS                 | Strain for protein expression and purification                   | Novagen    |
| BTH101                        | Strain for bacterial two-hybrid assay                            | Euromedex  |
| ML2321                        | BTH101 pUT18C pKT25                                              | This study |
| ML2322                        | BTH101 pUT18C- <i>gcrA</i> pKT25                                 | This study |
| ML2323                        | BTH101 pUT18C- <i>gcrA</i> pKT25- <i>rpoA</i>                    | This study |
| ML2324                        | BTH101 pUT18C- <i>gcrA</i> pKT25- <i>rpoB</i>                    | This study |
| ML2325                        | BTH101 pUT18C- <i>gcrA</i> pKT25- <i>rpoC</i>                    | This study |
| ML2326                        | BTH101 pUT18C- <i>gcrA</i> pKT25- <i>rpoZ</i>                    | This study |
| ML2327                        | BTH101 pUT18C- <i>gcrA</i> pKT25- <i>rpoD</i>                    | This study |
| ML2328                        | BTH101 pUT18C pKT25- <i>rpoA</i>                                 | This study |
| ML2329                        | BTH101 pUT18C pKT25- <i>rpoB</i>                                 | This study |
| ML2330                        | BTH101 pUT18C pKT25- <i>rpoC</i>                                 | This study |
| ML2331                        | BTH101 pUT18C pKT25- <i>rpoZ</i>                                 | This study |
| ML2332                        | BTH101 pUT18C pKT25- <i>rpoD</i>                                 | This study |
| ML2333                        | BTH101 pUT18 pKNT25                                              | This study |
| ML2334                        | BTH101 pUT18- <i>gcrA</i> pKNT25- <i>rpoD</i>                    | This study |
| ML2335                        | BTH101 pUT18- <i>gcrA</i> pKNT25- <i>rpoH</i>                    | This study |
| ML2336                        | BTH101 pUT18- <i>gcrA</i> pKNT25- <i>rpoN</i>                    | This study |
| ML2337                        | BTH101 pUT18- <i>gcrA</i> pKNT25                                 | This study |
| ML2338                        | BTH101 pUT18 pKNT25- <i>rpoD</i>                                 | This study |
| ML2339                        | BTH101 pUT18 pKNT25- <i>rpoH</i>                                 | This study |
| ML2340                        | BTH101 pUT18 pKNT25- <i>rpoN</i>                                 | This study |
| ML2341                        | BTH101 pUT18- <i>gcrA</i> pKNT25- <i>rpoD</i> <sub>1-574</sub>   | This study |
| ML2342                        | BTH101 pUT18- <i>gcrA</i> pKNT25- <i>rpoD</i> <sub>1-484</sub>   | This study |
| ML2343                        | BTH101 pUT18- <i>gcrA</i> pKNT25- <i>rpoD</i> <sub>107-484</sub> | This study |
| ML2344                        | BTH101 pUT18 pKNT25- <i>rpoD</i> <sub>1-574</sub>                | This study |
| ML2345                        | BTH101 pUT18 pKNT25- <i>rpoD</i> <sub>1-484</sub>                | This study |
| ML2346                        | BTH101 pUT18 pKNT25- <i>rpoD</i> <sub>107-484</sub>              | This study |
| ML2347                        | BTH101 pUT18C- <i>gcrA</i> <sub>1-50</sub> pKT25- <i>rpoD</i>    | This study |

|        |                                                                                                   |            |
|--------|---------------------------------------------------------------------------------------------------|------------|
| ML2348 | BTH101 pUT18C- <i>gcrA</i> <sub>108-173</sub> pKT25- <i>rpoD</i>                                  | This study |
| ML2349 | BTH101 pUT18C- <i>gcrA</i> <sub>1-50</sub> pKT25                                                  | This study |
| ML2350 | BTH101 pUT18C- <i>gcrA</i> <sub>108-173</sub> pKT25                                               | This study |
| ML2351 | BTH101 pUT18- <i>gcrA</i> pKNT25-CCNA_00393                                                       | This study |
| ML2352 | BTH101 pUT18- <i>gcrA</i> pKNT25-CCNA_00596                                                       | This study |
| ML2353 | BTH101 pUT18- <i>gcrA</i> pKNT25-CCNA_00685                                                       | This study |
| ML2354 | BTH101 pUT18- <i>gcrA</i> pKNT25-CCNA_01032                                                       | This study |
| ML2355 | BTH101 pUT18- <i>gcrA</i> pKNT25-CCNA_01187                                                       | This study |
| ML2356 | BTH101 pUT18- <i>gcrA</i> pKNT25-CCNA_01390                                                       | This study |
| ML2357 | BTH101 pUT18- <i>gcrA</i> pKNT25-CCNA_01718                                                       | This study |
| ML2358 | BTH101 pUT18- <i>gcrA</i> pKNT25-CCNA_01721                                                       | This study |
| ML2359 | BTH101 pUT18- <i>gcrA</i> pKNT25-CCNA_02790                                                       | This study |
| ML2360 | BTH101 pUT18- <i>gcrA</i> pKNT25-CCNA_02837                                                       | This study |
| ML2361 | BTH101 pUT18- <i>gcrA</i> pKNT25-CCNA_02977                                                       | This study |
| ML2362 | BTH101 pUT18- <i>gcrA</i> pKNT25-CCNA_03273                                                       | This study |
| ML2363 | BTH101 pUT18- <i>gcrA</i> pKNT25-CCNA_03362                                                       | This study |
| ML2364 | BTH101 pUT18- <i>gcrA</i> pKNT25-CCNA_03375                                                       | This study |
| ML2365 | BTH101 pUT18- <i>gcrA</i> pKNT25-CCNA_03419                                                       | This study |
| ML2366 | BTH101 pUT18- <i>gcrA</i> pKNT25-CCNA_03589                                                       | This study |
| ML2563 | BTH101 pUT18 pKNT25-CCNA_00393                                                                    | This study |
| ML2564 | BTH101 pUT18 pKNT25-CCNA_00596                                                                    | This study |
| ML2565 | BTH101 pUT18 pKNT25-CCNA_00685                                                                    | This study |
| ML2566 | BTH101 pUT18 pKNT25-CCNA_01032                                                                    | This study |
| ML2567 | BTH101 pUT18 pKNT25-CCNA_01187                                                                    | This study |
| ML2568 | BTH101 pUT18 pKNT25-CCNA_01390                                                                    | This study |
| ML2569 | BTH101 pUT18 pKNT25-CCNA_01718                                                                    | This study |
| ML2570 | BTH101 pUT18 pKNT25-CCNA_01721                                                                    | This study |
| ML2571 | BTH101 pUT18 pKNT25-CCNA_02790                                                                    | This study |
| ML2572 | BTH101 pUT18 pKNT25-CCNA_02837                                                                    | This study |
| ML2573 | BTH101 pUT18 pKNT25-CCNA_02977                                                                    | This study |
| ML2574 | BTH101 pUT18 pKNT25-CCNA_03273                                                                    | This study |
| ML2575 | BTH101 pUT18 pKNT25-CCNA_03362                                                                    | This study |
| ML2576 | BTH101 pUT18 pKNT25-CCNA_03375                                                                    | This study |
| ML2577 | BTH101 pUT18 pKNT25-CCNA_03419                                                                    | This study |
| ML2578 | BTH101 pUT18 pKNT25-CCNA_03589                                                                    | This study |
| ML2367 | BTH101 pUT18- <i>gcrA</i> pKNT25- <i>rpoD</i> - $\sigma_2$ - <i>chimeral</i> (Cc <sub>107</sub> - | This study |

|        |                                                                                                                                                                            |            |
|--------|----------------------------------------------------------------------------------------------------------------------------------------------------------------------------|------------|
|        | <i>159-Ec139-349-Cc390-484</i> )                                                                                                                                           |            |
| ML2368 | BTH101 pUT18- <i>gcrA</i> pKNT25- <i>rpoD</i> - $\sigma_2$ - <i>chimera2</i> ( <i>Ec</i> <sub>89-138</sub> - <i>Cc</i> <sub>160-389</sub> - <i>Ec</i> <sub>350-444</sub> ) | This study |
| ML2369 | BTH101 pUT18- <i>gcrA</i> pKNT25- <i>rpoD</i> - $\sigma_2$ - <i>Ecoli</i> <sub>89-444</sub>                                                                                | This study |
| ML2579 | BTH101 pUT18 pKNT25- <i>rpoD</i> - $\sigma_2$ - <i>chimera1</i> ( <i>Cc</i> <sub>107-159</sub> - <i>Ec</i> <sub>139-349</sub> - <i>Cc</i> <sub>390-484</sub> )             | This study |
| ML2580 | BTH101 pUT18 pKNT25- <i>rpoD</i> - $\sigma_2$ - <i>chimera2</i> ( <i>Ec</i> <sub>89-138</sub> - <i>Cc</i> <sub>160-389</sub> - <i>Ec</i> <sub>350-444</sub> )              | This study |
| ML2581 | BTH101 pUT18 pKNT25- <i>rpoD</i> - $\sigma_2$ - <i>Ecoli</i> <sub>89-444</sub>                                                                                             | This study |
| ML2370 | BL21DE3 pLysS pGEX-4T2                                                                                                                                                     | This study |
| ML2371 | BL21DE3 pLysS pGEX-4T2- <i>gcrA</i>                                                                                                                                        | This study |
| ML2372 | BL21DE3 pLysS pET28b-HIS <sub>6</sub> - <i>gcrA</i>                                                                                                                        | This study |
| ML2373 | BL21DE3 pLysS pET28b-HIS <sub>6</sub> - <i>rpoD</i>                                                                                                                        | This study |
| ML2374 | BL21DE3 pLysS pET28b-HIS <sub>6</sub> - <i>rpoH</i>                                                                                                                        | This study |
| ML2375 | BL21DE3 pLysS pET28b-HIS <sub>6</sub> - <i>rpoN</i>                                                                                                                        | This study |
| ML2378 | BL21DE3 pLysS pET28b-HIS <sub>6</sub> - <i>ccrM</i>                                                                                                                        | This study |

**Table S5: Plasmids**

| Plasmids                                                                          | Description/purpose                                                                                | Source                    |
|-----------------------------------------------------------------------------------|----------------------------------------------------------------------------------------------------|---------------------------|
| pENTR/D-TOPO                                                                      | Entry vector for Gateway cloning (kan <sup>R</sup> )                                               | Invitrogen                |
| pNPTS138                                                                          | Integration vector (kan <sup>R</sup> ) with <i>sacB</i> counterselection                           | Lab collection            |
| pNPTS-spec-DEST                                                                   | pNPTS138 derivative modified with spec <sup>r</sup> cassette                                       | (Gora et al. 2010)        |
| pMT375 (pRXMCS-5)                                                                 | Low-copy plasmid for xylose inducible expression of genes (tet <sup>R</sup> )                      | (Thanbichler et al. 2007) |
| pMT585 (pXGFPC-2)                                                                 | Vector for integration at P <sub>xyI</sub> (kan <sup>R</sup> )                                     | (Thanbichler et al. 2007) |
| pMT552 (pVGFP-2)                                                                  | Vector for integration at P <sub>van</sub> (kan <sup>R</sup> )                                     | (Thanbichler et al. 2007) |
| pMT644 (pVGFP-4)                                                                  | Vector for integration at P <sub>van</sub> (gent <sup>R</sup> )                                    | (Thanbichler et al. 2007) |
| pMT561(pVGFP-3)                                                                   | Vector for integration at P <sub>van</sub> (rif <sup>R</sup> )                                     | (Thanbichler et al. 2007) |
| pCT133                                                                            | Low-copy destination vector (tet <sup>R</sup> )                                                    | Lab collection            |
| pKO3                                                                              | Template for tet cassette amplification                                                            | Lab collection            |
| pENTR-spec-UP-tet-DW( <i>gcrA</i> )                                               | pENTR containing sequence for <i>tet</i> -marked in frame deletion of <i>gcrA</i>                  | This study                |
| pNPTS-spec-UP-tet-DW( <i>gcrA</i> )                                               | <i>tet</i> -marked in frame deletion of <i>gcrA</i>                                                | This study                |
| pMT585- <i>gcrA</i>                                                               | Integration of P <sub>xyI</sub> - <i>gcrA</i> at the xylose locus (kan <sup>R</sup> )              | This study                |
| pMT585- <i>gcrA</i> -3xFLAG                                                       | Integration of P <sub>xyI</sub> - <i>gcrA</i> -3xFLAG at the xylose locus (kan <sup>R</sup> )      | This study                |
| pNPTS138- <i>gcrA</i> -3xFLAG                                                     | Single integration of <i>gcrA</i> -3xFLAG at <i>gcrA</i>                                           | This study                |
| pNPTS138- <i>rpoC</i> -3xFLAG                                                     | Single integration of <i>rpoC</i> -3xFLAG at <i>rpoC</i>                                           | This study                |
| pNPTS138- <i>rpoH</i> -3xFLAG                                                     | Single integration of <i>rpoH</i> -3xFLAG at <i>rpoH</i>                                           | This study                |
| pNPTS138- <i>rpoN</i> -3xFLAG                                                     | Single integration of <i>rpoN</i> -3xFLAG at <i>rpoN</i>                                           | This study                |
| pNPTS138- <i>rpoC</i> -HIS <sub>10</sub>                                          | Single integration of <i>rpoC</i> -HIS <sub>10</sub> at <i>rpoC</i>                                | This study                |
| pNPTS138-P <sub>mipZ</sub> - <i>venus</i>                                         | Integration of P <sub>mipZ</sub> - <i>venus</i> at the CCNA_02236 locus                            | This study                |
| pNPTS138-P <sub>mipZ</sub> (LM)- <i>venus</i>                                     | Integration of P <sub>mipZ</sub> (LM)- <i>venus</i> at the CCNA_02236 locus                        | This study                |
| pNPTS138-P <sub>mipZ</sub> (NM)- <i>venus</i>                                     | Integration of P <sub>mipZ</sub> (NM)- <i>venus</i> at the CCNA_02236 locus                        | This study                |
| pMT552- <i>gcrA</i>                                                               | Integration of P <sub>van</sub> - <i>gcrA</i> at the van locus (kan <sup>R</sup> )                 | This study                |
| pNPTS-Δ <i>spoT</i>                                                               | Markerless deletion of <i>spoT</i>                                                                 | Lab plasmid collection    |
| pCT133-P <sub>lacI</sub> - <i>lacI</i> -P <sub>lac</sub> - <i>spoT</i> (H67A)     | Expression of hydrolase-defective mutant of <i>spoT</i>                                            | Lab plasmid collection    |
| pNPTS138-hfaAUP-P <sub>lacI</sub> - <i>lacI</i> -P <sub>lac</sub> -tetR-mCerulean | Integration of P <sub>lacI</sub> - <i>lacI</i> -P <sub>lac</sub> -tetR-mCerulean at the hfaA locus | Lab plasmid collection    |

|                                               |                                                                                     |                        |
|-----------------------------------------------|-------------------------------------------------------------------------------------|------------------------|
| hfaADW                                        |                                                                                     |                        |
| pMT561- <i>gcrA</i>                           | Integration of P <sub>van</sub> - <i>gcrA</i> at the van locus (rif <sup>R</sup> )  | This study             |
| pMT644- <i>gcrA</i>                           | Integration of P <sub>van</sub> - <i>gcrA</i> at the van locus (gent <sup>R</sup> ) | This study             |
| pMT375- <i>ftsN</i>                           | Xylose inducible expression of <i>ftsN</i>                                          | This study             |
| pMT375- <i>ftsZ</i>                           | Xylose inducible expression of <i>ftsZ</i>                                          | This study             |
| pMT375- <i>gcrA</i>                           | Xylose inducible expression of <i>gcrA</i>                                          | This study             |
| pMT375- <i>gcrA</i> -3xFLAG                   | Xylose inducible expression of <i>gcrA</i> -3xFLAG                                  | This study             |
| pMT375- <i>gcrA</i> <sub>1-107</sub> -3xFLAG  | Xylose inducible expression of <i>gcrA</i> <sub>1-107</sub> -3xFLAG                 | This study             |
| pMT375- <i>gcrA</i> <sub>51-173</sub> -3xFLAG | Xylose inducible expression of <i>gcrA</i> <sub>51-173</sub> -3xFLAG                | This study             |
| pKT25                                         | For generating genetic fusions of proteins to C-terminus of T25                     | (Karimova et al. 1998) |
| pKNT25                                        | For generating genetic fusions of proteins to N-terminus of T25                     | (Karimova et al. 1998) |
| pUT18                                         | For generating genetic fusions of proteins to N-terminus of T18                     | (Karimova et al. 1998) |
| pUT18C                                        | For generating genetic fusions of proteins to C-terminus of T18                     | (Karimova et al. 1998) |
| pUT18C- <i>gcrA</i>                           | T18-GcrA                                                                            | This study             |
| pUT18- <i>gcrA</i>                            | GcrA-T18                                                                            | This study             |
| pUT18C- <i>gcrA</i> <sub>1-50</sub>           | T18-GcrA <sub>1-50</sub>                                                            | This study             |
| pUT18C- <i>gcrA</i> <sub>108-173</sub>        | T18-GcrA <sub>108-173</sub>                                                         | This study             |
| pKT25- <i>rpoA</i>                            | T25-RpoA                                                                            | This study             |
| pKT25- <i>rpoB</i>                            | T25-RpoB                                                                            | This study             |
| pKT25- <i>rpoC</i>                            | T25-RpoC                                                                            | This study             |
| pKT25- <i>rpoZ</i>                            | T25-RpoZ                                                                            | This study             |
| pKT25- <i>rpoD</i>                            | T25-RpoD                                                                            | This study             |
| pKNT25- <i>rpoD</i>                           | RpoD-T25                                                                            | This study             |
| pKNT25- <i>rpoH</i>                           | RpoH-T25                                                                            | This study             |
| pKNT25- <i>rpoN</i>                           | RpoN-T25                                                                            | This study             |
| pKNT25- <i>rpoD</i> <sub>1-574</sub>          | RpoD <sub>1-574</sub> -T25                                                          | This study             |
| pKNT25- <i>rpoD</i> <sub>1-484</sub>          | RpoD <sub>1-484</sub> -T25                                                          | This study             |
| pKNT25- <i>rpoD</i> <sub>107-484</sub>        | RpoD <sub>107-484</sub> -T25                                                        | This study             |
| pKNT25-CCNA_00393                             | CCNA_00393-T25                                                                      | This study             |
| pKNT25-CCNA_00596                             | CCNA_00596-T25                                                                      | This study             |
| pKNT25-CCNA_00685                             | CCNA_00685-T25                                                                      | This study             |
| pKNT25-CCNA_01032                             | CCNA_01032-T25                                                                      | This study             |

|                                                                                                                                                      |                                                                                                                                               |                |
|------------------------------------------------------------------------------------------------------------------------------------------------------|-----------------------------------------------------------------------------------------------------------------------------------------------|----------------|
| pKNT25-CCNA_01187                                                                                                                                    | CCNA_01187-T25                                                                                                                                | This study     |
| pKNT25-CCNA_01390                                                                                                                                    | CCNA_01390-T25                                                                                                                                | This study     |
| pKNT25-CCNA_01718                                                                                                                                    | CCNA_01718-T25                                                                                                                                | This study     |
| pKNT25-CCNA_01721                                                                                                                                    | CCNA_01721-T25                                                                                                                                | This study     |
| pKNT25-CCNA_02790                                                                                                                                    | CCNA_02790-T25                                                                                                                                | This study     |
| pKNT25-CCNA_02837                                                                                                                                    | CCNA_02837-T25                                                                                                                                | This study     |
| pKNT25-CCNA_02977                                                                                                                                    | CCNA_02977-T25                                                                                                                                | This study     |
| pKNT25-CCNA_03273                                                                                                                                    | CCNA_03273-T25                                                                                                                                | This study     |
| pKNT25-CCNA_03362                                                                                                                                    | CCNA_03362-T25                                                                                                                                | This study     |
| pKNT25-CCNA_03375                                                                                                                                    | CCNA_03375-T25                                                                                                                                | This study     |
| pKNT25-CCNA_03419                                                                                                                                    | CCNA_03419-T25                                                                                                                                | This study     |
| pKNT25-CCNA_03589                                                                                                                                    | CCNA_03589-T25                                                                                                                                | This study     |
| pKNT25- <i>rpoD</i> - $\sigma_2$ -<br><i>chimera1</i> ( <i>Cc</i> <sub>107-159</sub> - <i>Ec</i> <sub>139-349</sub> - <i>Cc</i> <sub>390-484</sub> ) | <i>rpoD</i> - $\sigma_2$ - <i>chimera1</i> ( <i>Cc</i> <sub>107-159</sub> - <i>Ec</i> <sub>139-349</sub> - <i>Cc</i> <sub>390-484</sub> )-T25 | This study     |
| pKNT25- <i>rpoD</i> - $\sigma_2$ -<br><i>chimera2</i> ( <i>Ec</i> <sub>89-138</sub> - <i>Cc</i> <sub>160-389</sub> - <i>Ec</i> <sub>350-444</sub> )  | <i>rpoD</i> - $\sigma_2$ - <i>chimera2</i> ( <i>Ec</i> <sub>89-138</sub> - <i>Cc</i> <sub>160-389</sub> - <i>Ec</i> <sub>350-444</sub> )-T25  | This study     |
| pKNT25- <i>rpoD</i> - $\sigma_2$ - <i>Ecoli</i> <sub>89-444</sub>                                                                                    | <i>rpoD</i> - $\sigma_2$ - <i>Ecoli</i> <sub>89-444</sub> -T25                                                                                | This study     |
| pGEX-4T2                                                                                                                                             | Expression vector with GST tag                                                                                                                | Lab collection |
| pET28b                                                                                                                                               | Expression vector with His <sub>6</sub> tag                                                                                                   | Lab collection |
| pGEX-4T2- <i>gcrA</i>                                                                                                                                | Expression vector for purification of GST-GcrA                                                                                                | This study     |
| pET28b-HIS <sub>6</sub> - <i>gcrA</i>                                                                                                                | Expression vector for purification of HIS <sub>6</sub> -GcrA                                                                                  | This study     |
| pET28b-HIS <sub>6</sub> - <i>rpoD</i>                                                                                                                | Expression vector for purification of HIS <sub>6</sub> -RpoD                                                                                  | This study     |
| pET28b-HIS <sub>6</sub> - <i>rpoH</i>                                                                                                                | Expression vector for purification of HIS <sub>6</sub> -RpoH                                                                                  | This study     |
| pET28b-HIS <sub>6</sub> - <i>rpoN</i>                                                                                                                | Expression vector for purification of HIS <sub>6</sub> -RpoN                                                                                  | This study     |
| pET28b-HIS <sub>6</sub> - <i>ccrM</i>                                                                                                                | Expression vector for purification of HIS <sub>6</sub> -CcrM                                                                                  | This study     |

**Table S6: Primers**

| <b>Primer</b>             | <b>Sequence (5'→3')</b>                                      |
|---------------------------|--------------------------------------------------------------|
| OL3_up_gcrA_F             | CACCTCAGGAAGTCCGGCGTCAG                                      |
| OL4_up_gcrA_R             | CGATATCAAGCTTATCGATAACCGGTCGGTCCAGCTCATTACCCGTCT             |
| OL5_dw_gcrA_F             | GGAACTTCTTGAATTCTGCAGCTGGCCCCGCTCGCTTCGCCGCTACATCTAAG        |
| OL6_dw_gcrA_R             | AGCGCGAGCCGGCCGGATAG                                         |
| OL7_tet_F                 | CGGTATCGATAAGCTTGATATCG                                      |
| OL8_tet_R                 | CTGCAGGAATTCAAGAAGTTCC                                       |
| OL17_NdeI_gcrA_F          | GATTCATATGAGCTGGACCGACGAACG                                  |
| OL18_SacI_gcrA_R          | GTAGGAGCTCTTAGATGTAGCGGCGAAGCG                               |
| OL69_del_gcrA_ver_F       | CCGTAAGCCCCGAAATAAAGCACCGCCAGAGG                             |
| OL70_del_gcrA_ver_R       | CGGTGCGGGATGCGGTGCAGGATGTGCGGGATC                            |
| GcrA-3xFLAGSOE-CTERM-R    | CCGTCGTGGTCCTTGTAGTCGATGTAGCGGCGAAGCGAGCG                    |
| 3xFLAG-F                  | GACTACAAGGACCACGACGGCG                                       |
| 3xFLAG-SACI-R             | AGATACGAGCTCTTACTTGTGTCGTCGTCGTCCTTGTAGTCG                   |
| HindIII-GcrActerm3XFLAG_F | AGATAAGCTTCGGCCTTTCGGCCAGCCAGATC                             |
| rpoC-HindIII-Cterm-F      | AGATACAAGCTTGGCAACCAGCCCCGAGGCGGTTCG                         |
| Rev-rpoC3Xflag            | CCGTCGTGGTCCTTGTAGTCTTCGGCGTCCGAAAGCGCGATCTCG                |
| RpoN-HindIII-3X-F         | AGATAAGCTTATCTGCGGGCTCGACGACGAAGATC                          |
| rpoN-3X-R                 | CCGTCGTGGTCCTTGTAGTCGACCGCTTCCTTCATCAGCCGGC                  |
| rpoH-HindIII-3X-F         | AGATAAGCTTATCCGCAAGCGGCCACAAGATG                             |
| rpoH-3X-Flag-R            | CCGTCGTGGTCCTTGTAGTCGGCGTCGACCATGTTCTTGGCGATC                |
| Rev-3x flag EcorI         | AGATACGAATTCTTACTTGTGTCGTCGTCGTCCTTGTAGTCG                   |
| rpoC-R1linker             | TGGTGATGATGTGAACCGCCTGATCCGCCTTCGGCGTCCGAAAGCGCGATCTCG       |
| rpoC-R2linker-10His       | AGATGAATTCTTAGTGGTGATGATGGTGGTGATGGTGGTGATGTGAACCGCCTG<br>AT |
| FtsN-NdeI-F               | AGATCATATGTCCGATCCGCACCGCGGG                                 |
| FtsN-SacI-R               | AGATGAGCTCTCACTTTACGAAGCAGGATTTGCCG                          |
| NdeI-FtsZ-F               | AGATACCATATGGCTATTTCTCTTTCCGCGC                              |
| FtsZ-R-SacI               | AGATGAGCTCTCAGTTGGCCAGGCGGCGCAG                              |
| NL-fuse3Xflag             | CCGTCGTGGTCCTTGTAGTCCGAGCCGGGTTCTTCGTGACGG                   |
| GcrA-Cterm-151-F-NdeI     | AGATCATATGCCCTCGCAACCGGCCGTCGG                               |



|                      |                                                      |
|----------------------|------------------------------------------------------|
| CAP133               | AATTGAAGCCGGCTGGCGCCAAGCTTCGACGGCCTAGAGGGTGGACATC    |
| CAP134               | GTCCACCGTCTCAGACGACAACGCGCCCGATTC                    |
| CAP135               | GCGTTGTCGTCTGAGACGGTGGACCGGACGCG                     |
| CAP136               | GCGTCACGGCCGAAGCTAGCGAATTCATCCCGTTGCCTCGGCATC        |
| CAP173               | GAGCGAACTGGAAGTGGTCCG                                |
| CAP174               | CACGCCGTCAGACTGCGTAAC                                |
| CAP66                | GCGGCCGCCCCCTTACCATGAATTCGCATGCATTTACGTTGACACCA      |
| CAP391               | CACAGACGACATAGCTGTTTCTGTGTGAAATTGTTATCC              |
| CAP392               | CAGGAAACAGCTATGTCGTCTGTGGCCCCCGTC                    |
| CAP393               | GCTCTAGAAGTGTGGATCCCCCGGGCTACCCCCGCGTCCGGTCCAC       |
| CAP394               | GCGATCCCTACTATGCTGCCCGATCGAGGTGGCGG                  |
| CAP395               | CCGCCACCTCGATCGGGGCAGCATAGTAGGGATCGC                 |
| CAP94                | AATTGAAGCCGGCTGGCGCCAAGCTTACATCGGTCCAAGCTGGCC        |
| CAP95                | GTAAATGCATGCCCAAGTCTCGAAAAAATGGTTAAGCC               |
| CAP96                | CGAGACCTTGGGGCATGCATTTACGTTGACACCATCG                |
| CAP137               | TCTAGACATCATAGCTGTTTCTGTGTGAAATTGTTATCCG             |
| CAP138               | CAGGAAACAGCTATGATGTCTAGATTAGATAAAAGTAAAGTGATTAACAGCG |
| CAP139               | CTGTACAAGTAAGCTATCCCTCATGCTGTATCTTTTTGGC             |
| CAP140               | ATGAGGGATAGCTTACTTGTACAGCTCGTCCATGCCG                |
| CAP99                | GCGTCACGGCCGAAGCTAGCGAATTCATTTCGGAGTACCGCCCTTC       |
| CAP60                | GCCCTTGCTCACCAACTCGAGGATGTCAGACCCAC                  |
| CAP61                | ATCCTCGAGTTGGTGAGCAAGGGCGAGGAG                       |
| F-GcrA-BamHI         | GATTGGATCCATGAGCTGGACCGACGAACG                       |
| R-GcrA-SalI          | GTAGGTTCGACTTAGATGTAGCGGCGAAGCG                      |
| RpoD-pet28-NdeI-F    | AGATCATATGTTGATGAGCAACAATTCCTCGGCC                   |
| rpoD-pet28-HindIII-R | AGATAAGCTTTTACGAGTCCAGGAAGCTGCGCAG                   |
| rpoH-pet28-NdeI-F    | AGATCATATGAGTAAGATGGCCGTGAATTCTCTATCG                |
| rpoH-pet28-HindIII-R | AGATAAGCTTCTAGGCGTCGACCATGTTCTTGG                    |
| rpoN-pet28-NdeI-F    | AGATCATATGTTGGCGCTCAGCCACCGACTAG                     |
| rpoN-pet28-HindIII-R | AGATAAGCTTTTACGACCGCTTCCTTCATCAGCC                   |
| ccrm-NdeI-F          | AGATCATATGAAGTTCGGGCCGAAACC                          |
| ccrm-EcoRI-R         | AGATGAATTCTCAGTTCATCCCCGCCGCAC                       |
| GcrA-XbaI-F          | AGATTCTAGAGATGAGCTGGACCGACGAACGG                     |
| GcrA-KpnI-stop-R     | AGATGGTACCTTAGATGTAGCGGCGAAGCGAGC                    |
| GcrA-KpnI-R          | AGATGGTACCCGGATGTAGCGGCGAAGCGAGCG                    |
| rpoA-XbaI-F          | AGATTCTAGAGGTGATCGAAAGAACTGGAACGAGCTG                |

|                   |                                            |
|-------------------|--------------------------------------------|
| rpoA-KpnI-stop-R  | AGATGGTACCTTAGATCTGGTCTTCGAACTTCTTGGCC     |
| rpoB-XbaI-F       | AGATTCTAGAGATGGCGCAATCCTTCACCGGCAAG        |
| rpoB-KpnI-stop-R  | AGATGGTACCTCAGCTGTTCTCCAGCTCGACGTTTC       |
| rpoC-XbaI-F       | AGATTCTAGAGATGAACCAGGAAGTCCTGAACATCTTCAATC |
| rpoC-KpnI-stop-R  | AGATGGTACCCTATTCGGCGTCCGAAAGCGCG           |
| omega-XbaI-F      | AGATTCTAGAGATGGCCCGCGTCACCGTCGAAG          |
| omega-KpnI-stopR  | AGATGGTACCTCAGTACCGCTCCTCCTGACCAC          |
| s70-XbaI-F        | AGATTCTAGAGTTGATGAGCAACAATCCTCGGCC         |
| s70-KpnI-stop-R   | AGATGGTACCTTACGAGTCCAGGAAGCTGCGCAG         |
| s70-KpnI-R        | AGATGGTACCCGCGAGTCCAGGAAGCTGCGCAGC         |
| GcrA-1-150-stop-R | AGATGGTACCTTAAGCCGCGCGGCCGACAGGCC          |
| GcrA-322-end-F    | AGATTCTAGAGGCCACCGTGCTGACCCTGGGCG          |
| rpoH-F-b2h        | AGATTCTAGAGATGAGTAAGATGGCCGTGAATTCTCTATCG  |
| rpoH-R-b2h        | AGATGGTACCCGGGCGTCGACCATGTTCTTGGCG         |
| rpoN-F-b2h        | AGATTCTAGAGTTGGCGCTCAGCCACCGACTAGAG        |
| rpoN-R-b2h        | AGATGGTACCCGGACCGCTTCTTCATCAGCCGG          |
| rpoDaa484-R       | AGATGGTACCCGGGCGATCGAGCGGGTGATCGC          |
| sig70-1-3-R       | AGATGGTACCCGCGCGTCGATCGGCAGGATGGC          |
| sig70nt319-F      | AGATTCTAGAGGGCGCCTATGACCGCACCGACG          |
| CCNA_00393-F-B2H  | AGATTCTAGAGTTGAGCCCTCTCGATCAAACGGC         |
| CCNA_00393-R-B2H  | AGATGGTACCCGGTTGGCGCTTGCCATAAAGCTCC        |
| B2H-00596-F       | AGATTCTAGAGTTGCGGTATCCCGGGCCCAGG           |
| B2H-00596-R       | AGATGGTACCCGCAGCTCGAACCATCCATCCTCC         |
| CCNA_00685-F      | AGATTCTAGAGGTGGGCATGTATGCGACAGGAC          |
| CCNA_00685-R      | AGATGGTACCCGCGACGCGACTCCCGCCTCGCG          |
| B2H-1032-F        | AGATTCTAGAGTTGAGGGGAGCGTTGATGGCG           |
| B2H-1032-R        | AGATGGTACCCGCCGCTTCGCGTCGTGATCCCG          |
| B2H-1187-F        | AGATTCTAGAGATGAGCGATCTGGCGAGCCTG           |
| B2H-1187-R        | AGATGGTACCCGTGAGCGTCCCCGCCTGCGCGAC         |
| CCNA_01390-F-B2H  | AGATTCTAGAGATGCTCTACGCCATTCTTTGCTACAACC    |
| CCNA_01390-R-B2H  | AGATGGTACCCGGACCCTGGTCGCCATCGTGTCC         |
| B2H-1718-F        | AGATTCTAGAGATGGACGCCGCGCTCGTCAG            |
| B2H-1718-R        | AGATGGTACCCGTGAGATCCTCCCAGAACC GCC         |
| B2H-1721-F        | AGATTCTAGAGTTGATTTCAATGGGCATGGAACG         |
| B2H-1721-R        | AGATGGTACCCGGCCATGAGCTTCCCTCCTCGCG         |
| B2H-2790-F        | AGATTCTAGAGATGAGTAAAGTGAGACAATATCGTCGTGCG  |

|                       |                                                                |
|-----------------------|----------------------------------------------------------------|
| B2H-2790-R            | AGATGGTACCCGGCCCCGGATCATGTCGGCGC                               |
| B2H-2837-F            | AGATTCTAGAGTTGGTCTCCGACGGGAACGATC                              |
| B2H-2837-R            | AGATGGTACCCGCGCTTCGCTCGCGTCAGATC                               |
| B2H-2977-F            | AGATTCTAGAGATGGACCAGCAGACTCAGAAGAGCTTC                         |
| B2H-2977-R            | AGATGGTACCCGTGCCGCCAGCCGTTCCAGATC                              |
| B2H-3273-F            | AGATTCTAGAGGTGCGGACGGATGATCTGATCG                              |
| B2H-3273-R            | AGATGGTACCCGCCACCTCAGCAGCCAGCGTCCC                             |
| B2H-3375-F            | AGATTCTAGAGATGACGGTCGCGGAGACCATC                               |
| B2H-3375-R            | AGATGGTACCCGCCCTAGCCCAAGGGCCTGCGG                              |
| B2H-3419-F            | AGATTCTAGAGTTGAGCCGAGACCACGACAACCTTC                           |
| B2H-3419-R            | AGATGGTACCCGAACTCCATCGTCGGATCCCTC                              |
| B2H-3589-F            | AGATTCTAGAGATGGTCGCGGAACAGGTCGG                                |
| B2H-3589-R            | AGATGGTACCCGCCGAAGGCGCTCAATCGCTC                               |
| CC-159-R-fuse-EC139   | AGCAGATAGGTGATCGCTTCGAAGGTCAGGGCCGACTCGCAC                     |
| EC139-F               | GAAGCGATCACCTATCTGCTGGAACAG                                    |
| EC349-R               | TTCTCAATCTGCTGCAGTTTTTTCGAC                                    |
| CC-390-F-fuse-EC349   | AACTGCAGCAGATTGAAGAAGAAACCGGCGTGCCGATCGAC                      |
| 89Ec-F-XbAI           | AGATTCTAGAGTCTGAAATCGGGCGCAGACTGAC                             |
| EC138-R               | CGGATATTCAGCAACGGAGCATTGAAC                                    |
| CC-160-F-fuseEC138    | GCTCCGTTGCTGAATATCCGGAAGCCATCATGGTGTGGCGCG                     |
| 389CCfuse350EC-R      | TCGATGGTCAGGCCGGTTTTCGGTGGCCAGGGCGGCGATCTCGC                   |
| 350Ec-F               | GAAACCGGCTGACCATCGAGCAG                                        |
| EC444-R-KpnI          | AGATGGTACCCGCGCGATAGAGCGGGTGATCGCC                             |
| FB-ftsZ-F             | GGATGAGCCTCAGCGCGTTCGG                                         |
| FB-ftsZ-R             | GGCCGGGGATGCCTCGACGATC                                         |
| FB-mipZ-F             | GGACCAACGGGAACGCGTCCACAG                                       |
| FB-mipZ-R             | GGACGACGATAACGCGCGTTTTCGG                                      |
| FB-ccka-F             | GGAAAGAAGCCCCAGCCCCGG                                          |
| FB-ccka-R             | GGTTGTACCTTTCTTACGGCGAGCC                                      |
| FB-ftsN-F-soe-T0AG6A  | AACCTAGGGTCGCGCGCGTCAGATTCAATGCGTCGTTCCGTGCGCCGC               |
| FB-mipZ-R-soe-mutants | TAATCGAAGGTTAACACGATGTTTCCCG                                   |
| FB-mipZ-G3TG6A-T0GG6T | ATCGTGTTAACCTTCGATTAAGATTACGGAGTCTCGACGCAGAAGGATCCGAG<br>CCATG |
| FB-mipZ-A4T-G1C       | ATCGTGTTAACCTTCGATTAAGAGACGCTCAGTCGCGACGCAGAAGGATCCG           |
| FB-mipZ-R-soe-outside | GCGACCTTGGCGCCGCGTACAG                                         |

|                    |                                            |
|--------------------|--------------------------------------------|
|                    |                                            |
| R0059-F            | CGGCGACAAAGTTGTTTCAGT                      |
| R0059-R            | TACCAAGGATGCGCTCTACC                       |
| R0021-F            | CTGAAAAGGTCGTTGCATCC                       |
| R0021-R            | CCAAAAACCGCAGTGTTACC                       |
| rpsL-F             | AAGCCCGGAAGGAACGCAAG                       |
| rpsL-R             | TTAACCGACGCGGGAACAGG                       |
| 01305-F            | AAGGCGCCTATCCAGAACC                        |
| 01305-R            | GTACGTTCCGGAATCGGTTT                       |
| ruvA-F             | CGAGTGAGGAAGCCGTAGAG                       |
| ruvA-R             | GACCCTGTTGCACATCGAG                        |
| Venus-F            | ATGGTGAGCAAGGGCGAGGAGCTG                   |
| Venus-R-NheI       | AGATGCTAGCTTACTTGTACAGCTCGTCCATGCCGAG      |
| 2236-F-HindIII     | AGATAAGCTTTCCCAACATGGCGGGCTACAAG           |
| 2236-R-fuse-mipZ   | GGACGCGTTCCCGTTGGTCCTCAGCGACAGAGGGTCTCCAGC |
| PmipZ-R-fuse-VENUS | TCCTCGCCCTTGCTCACCATGGCTCGGATCCTTCTGCGTCG  |

**Table S7: ChIP-Seq strains and conditions**

| Strain | Genotype                                            | Condition                                               | Antibody                  |
|--------|-----------------------------------------------------|---------------------------------------------------------|---------------------------|
| ML2297 | $\Delta gcrA(tet^R)$ ; $P_{xyt-gcrA-3xFLAG(kan^R)}$ | PYE + 0.3% xylose                                       | Anti-FLAG (Sigma-Aldrich) |
| ML2296 | $\Delta gcrA(tet^R)$ ; $P_{xyt-gcrA(kan^R)}$        | PYE + 0.3% xylose                                       | Anti-FLAG (Sigma-Aldrich) |
| ML2298 | $gcrA::gcrA-3xFLAG(kan^R)$                          | PYE                                                     | Anti-FLAG (Sigma-Aldrich) |
| ML2299 | $rpoC::rpoC-3xFLAG(kan^R)$                          | PYE                                                     | Anti-FLAG (Sigma-Aldrich) |
| ML2297 | $\Delta gcrA(tet^R)$ ; $P_{xyt-gcrA-3xFLAG(kan^R)}$ | PYE + 0.3% xylose + rifampicin 25 $\mu$ g/mL for 30 min | Anti-FLAG (Sigma-Aldrich) |
| ML2299 | $rpoC::rpoC-3xFLAG(kan^R)$                          | PYE + rifampicin 25 $\mu$ g/mL for 30 min               | Anti-FLAG (Sigma-Aldrich) |
| CB15N  | Synchronizable wild-type CB15                       | PYE                                                     | Anti-FLAG (Sigma-Aldrich) |
| CB15N  | Synchronizable wild-type CB15                       | PYE                                                     | Anti-RpoD (Neoclone)      |
| CB15N  | Synchronizable wild-type CB15                       | PYE + rifampicin 25 $\mu$ g/mL for 30 min               | Anti-RpoD (Neoclone)      |
| ML2300 | $rpoH::rpoH-3xFLAG(kan^R)$                          | PYE + rifampicin 25 $\mu$ g/mL for 30 min               | Anti-FLAG (Sigma-Aldrich) |
| ML2301 | $rpoN::rpoN-3xFLAG(kan^R)$                          | PYE + rifampicin 25 $\mu$ g/mL for 30 min               | Anti-FLAG (Sigma-Aldrich) |

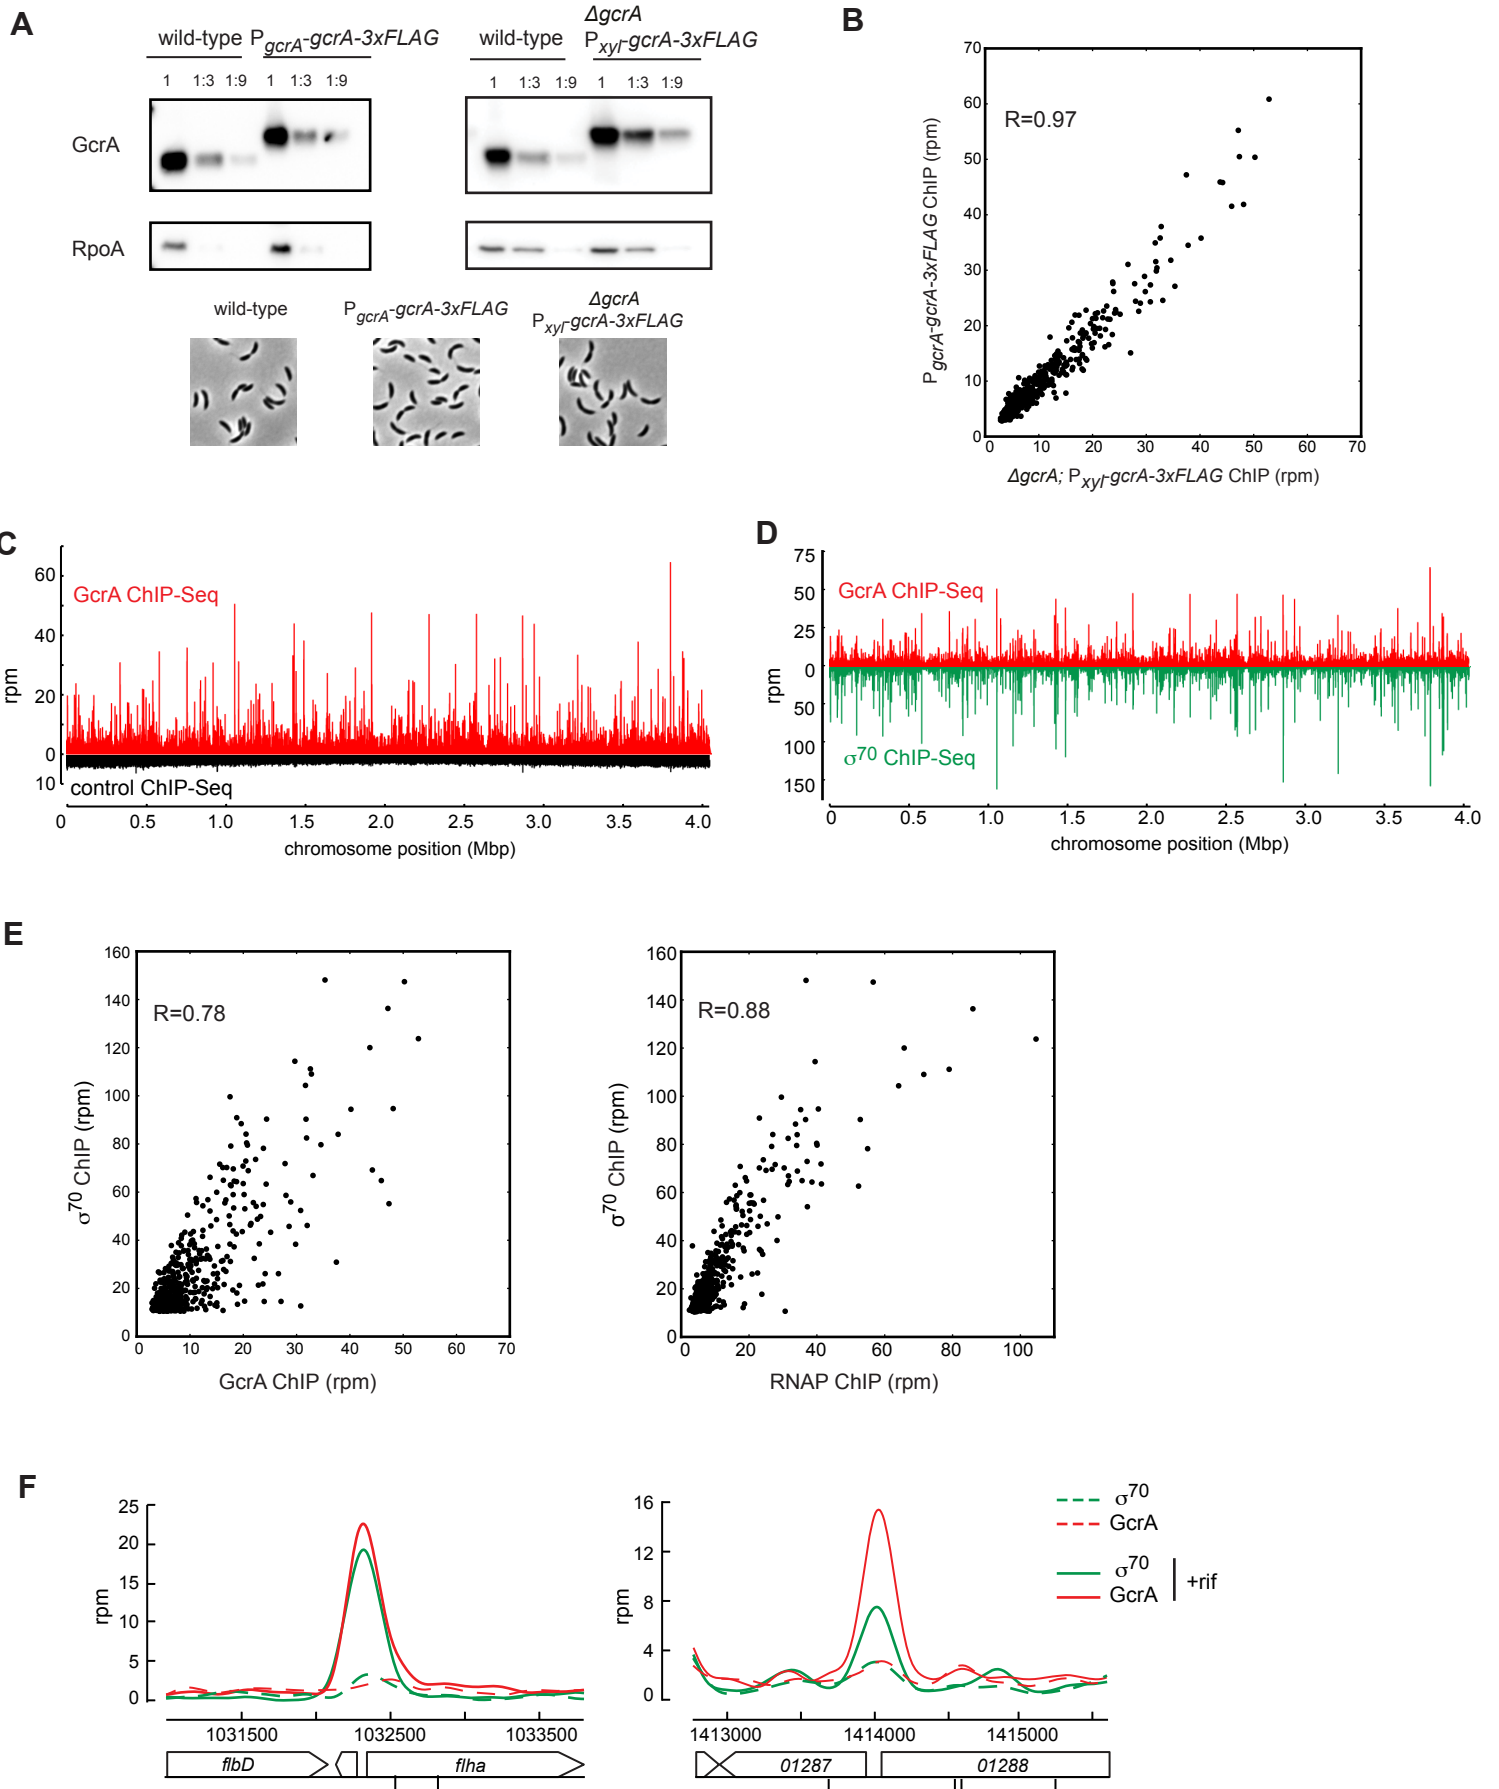

**A**

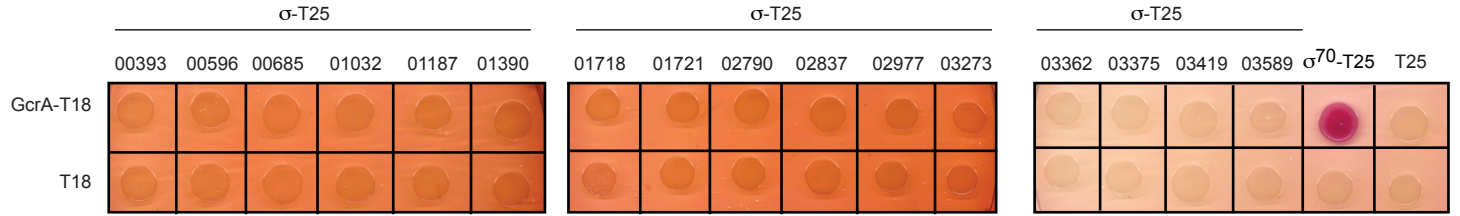

**B**

$\sigma^{70}$  domain 2

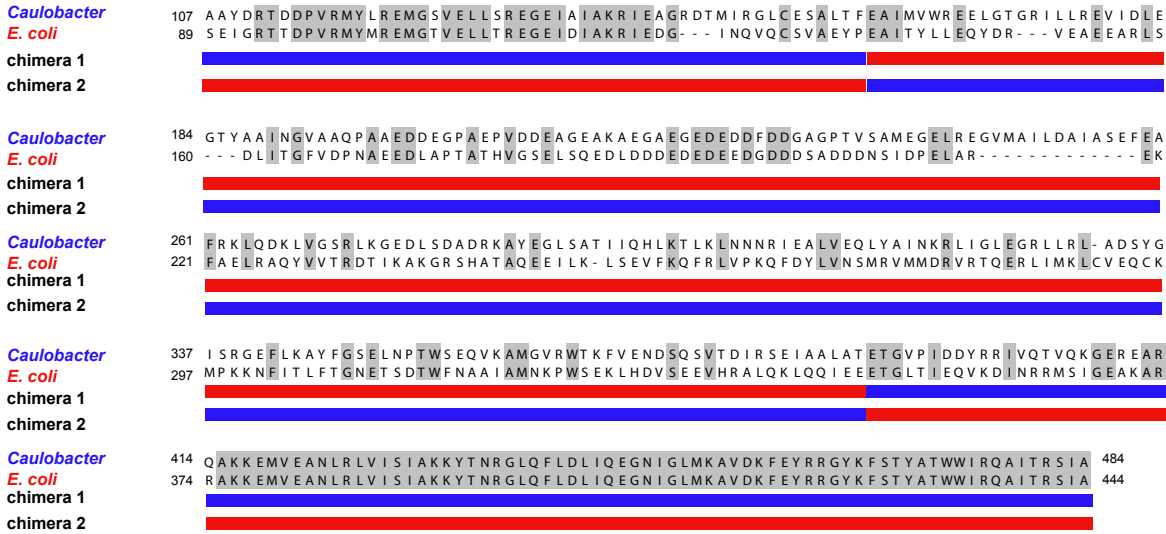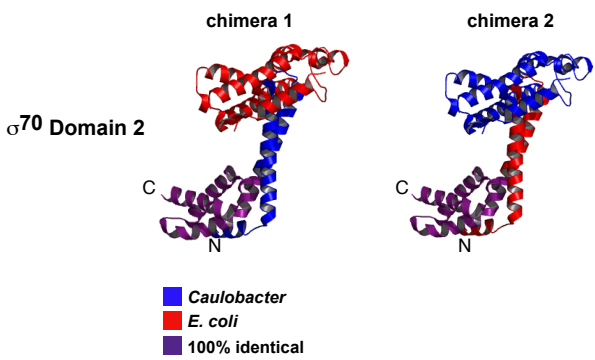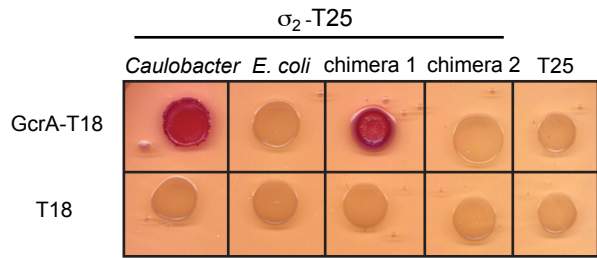

**C**

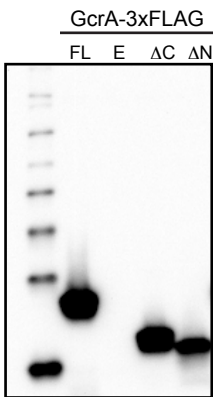

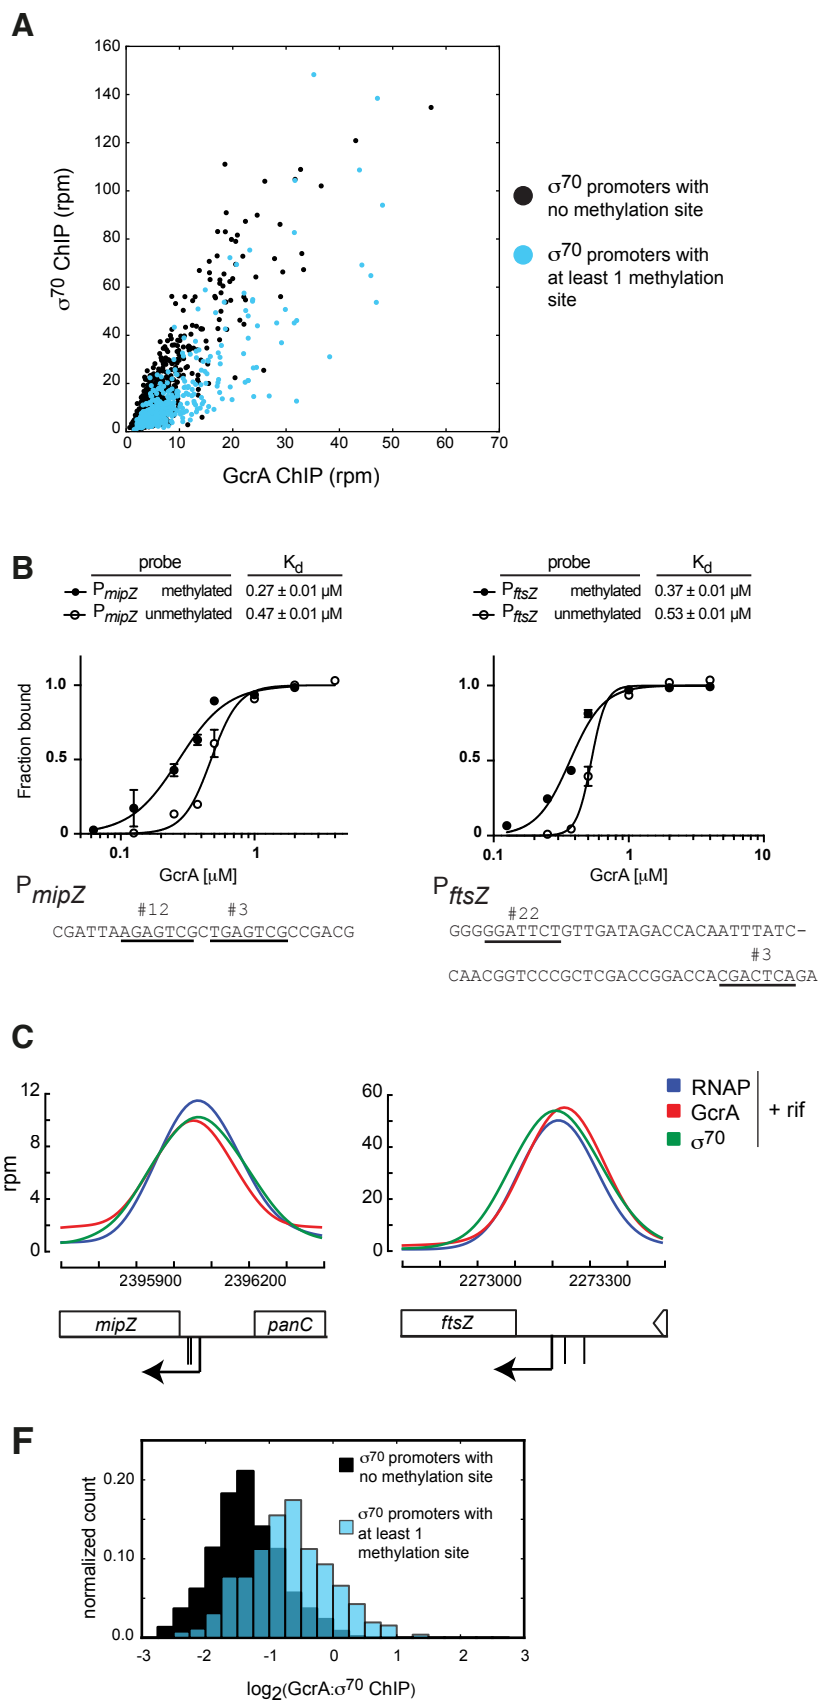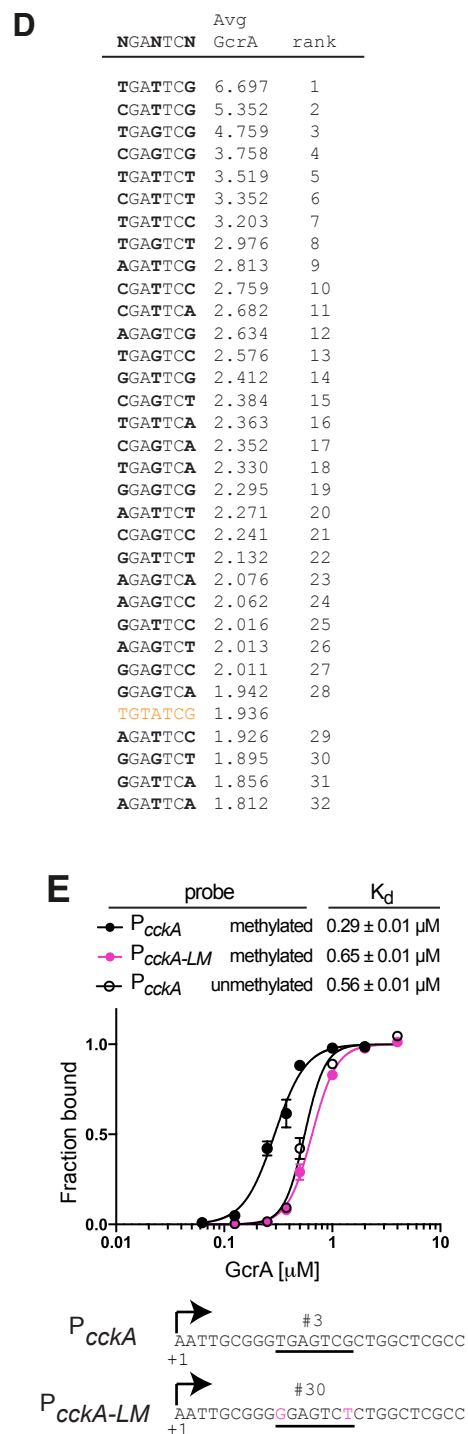



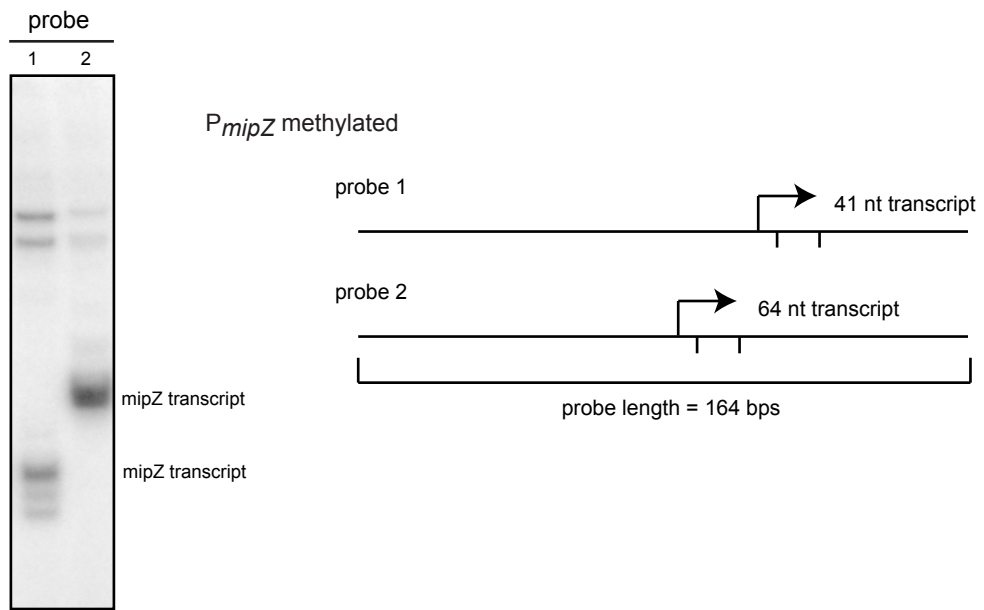

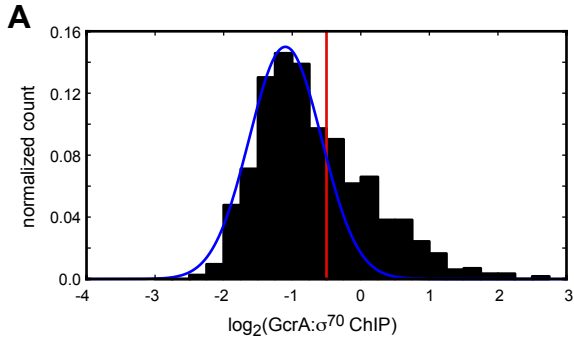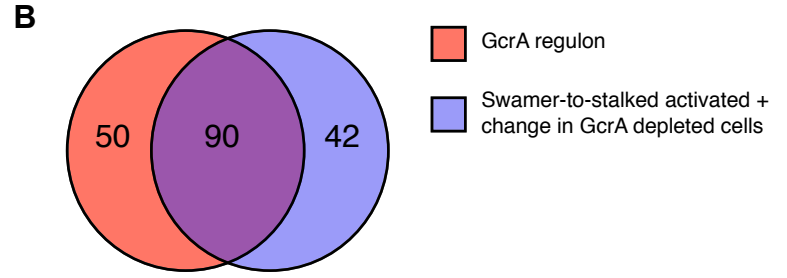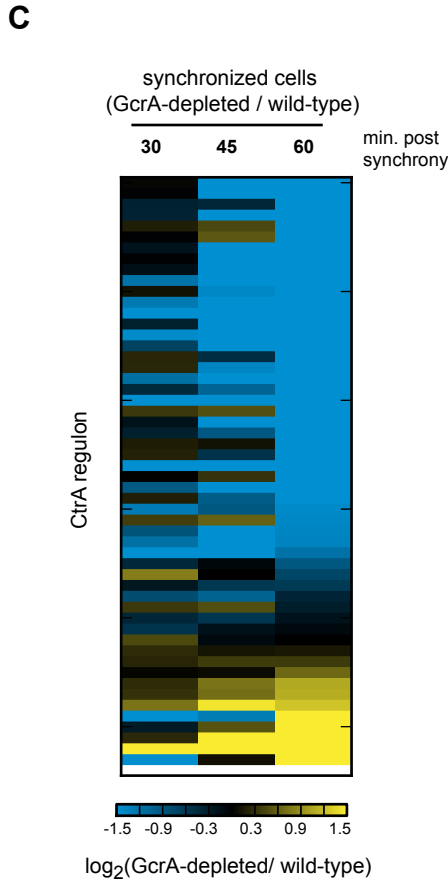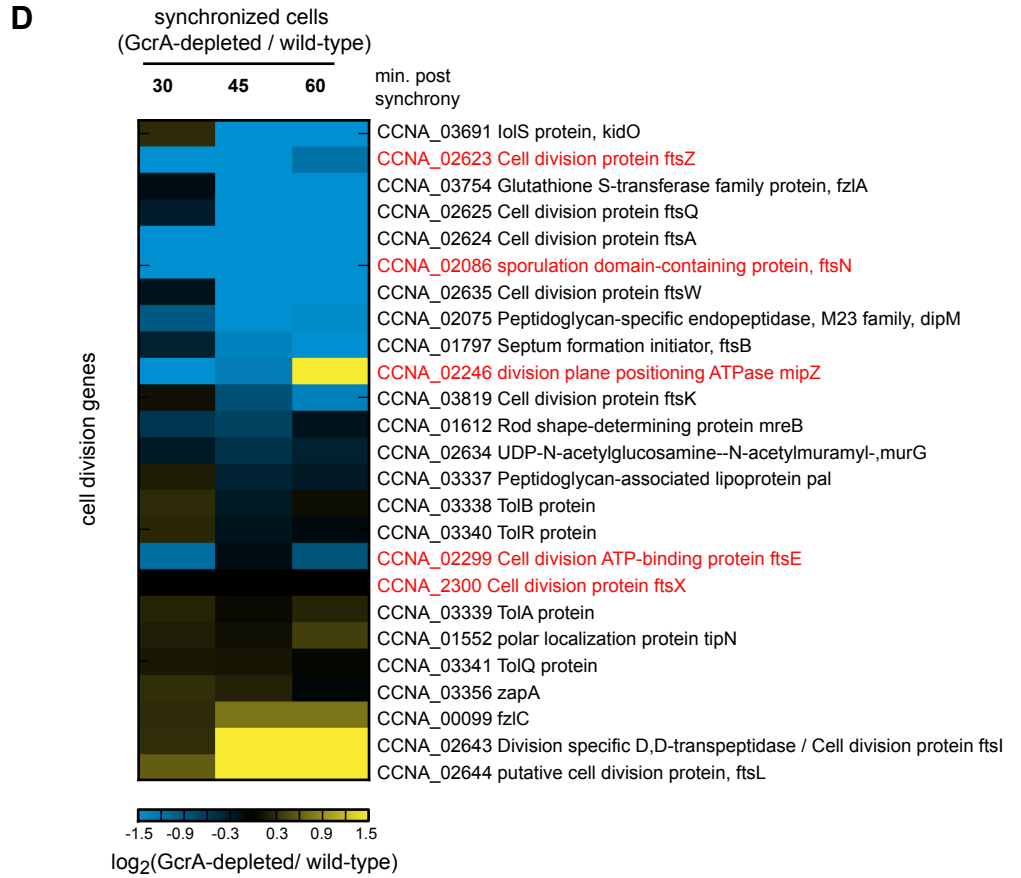

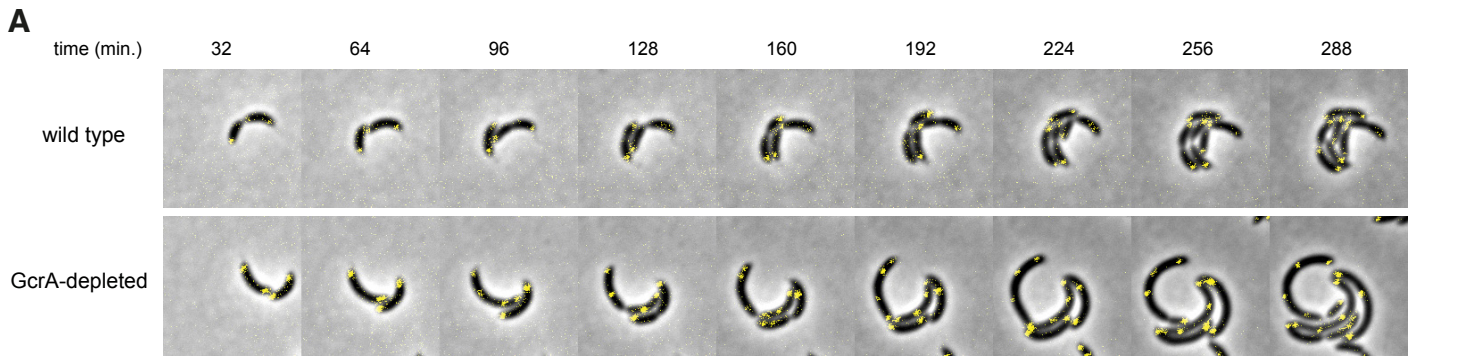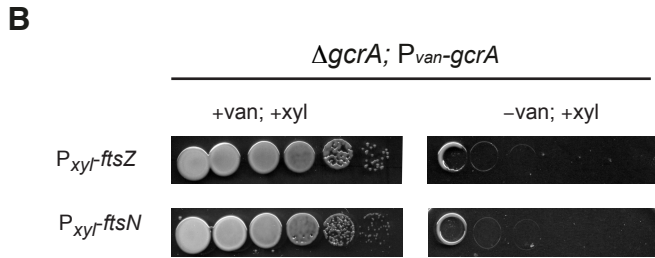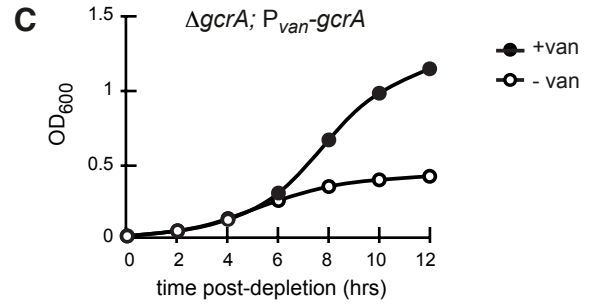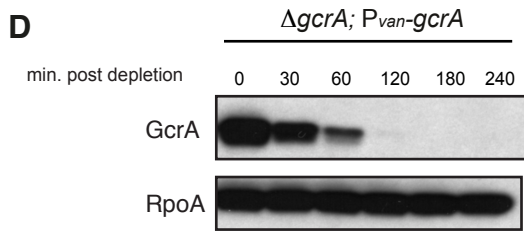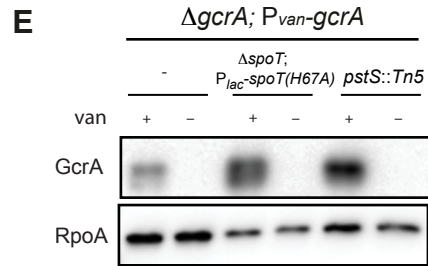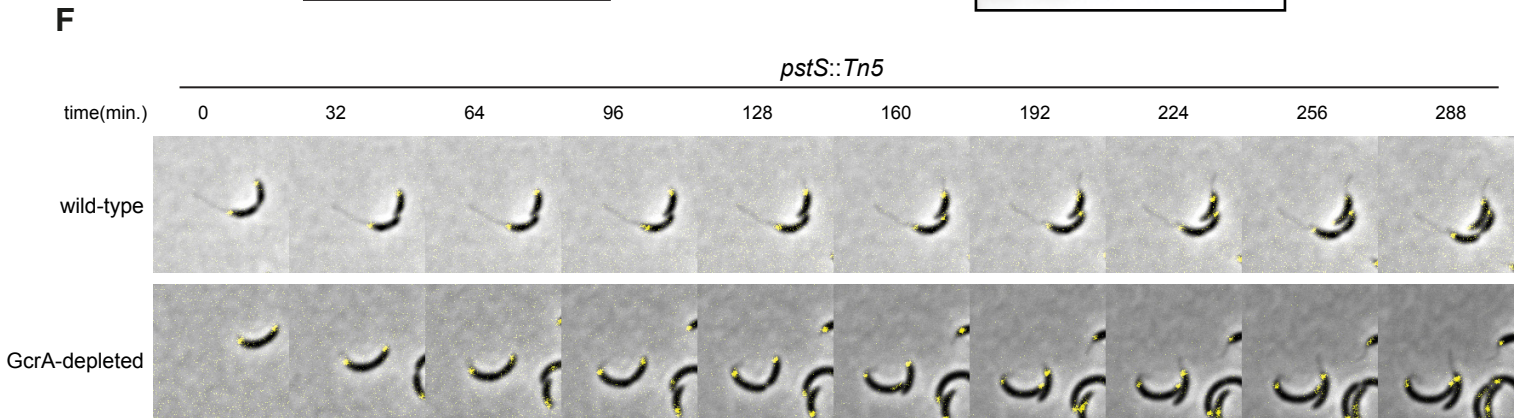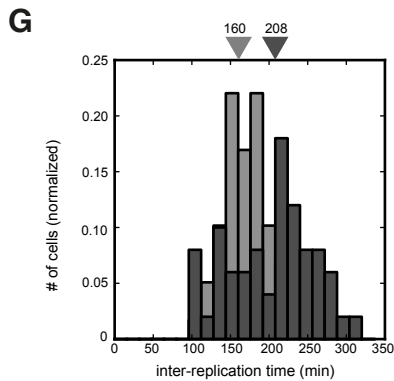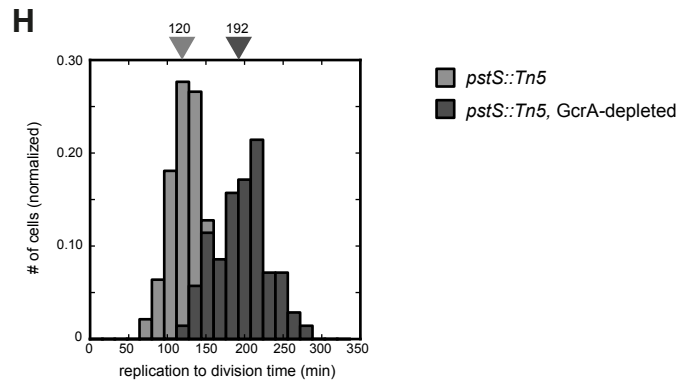

Supplement: supp_29.21.2272_SuppMaterial.pdf [file supp_29.21.2272_SuppMaterial.pdf]
